# Supplementary material for: Annual-scale assessment of mid-20th century anthropogenic impacts on the algal ecology of Crawford Lake, Ontario, Canada
Source: PeerJ. 2023 Mar 8;11:e14847. doi: 10.7717/peerj.14847 (PMC10007962; doi:10.7717/peerj.14847)
Supplement: Supplemental Information 2 [file peerj-11-14847-s002.xlsx]

## Sheet: complete_counts
Sample Code	Year/Taxon	Ach long cap	Ach cal	Ach hun	Ach min	Achn micro	Ach 34-2	Ach 35-2	Ach 35-3	Achn 36-2	Ach 54-1	Ach 56-1	Ach sp.61	Ach 65-6	Achn sp.43	Ach 37-1	Ach 37-2	Ach 56-1	Ach sp.1	Ach sp.22	Ach sp.65	Ach sp.66	Ach sp.68	Ach sp.77	Ach sp.88	Ach sp.99	Ach sp.115	Ach sp.150	Ach sp.154	Ach sp.152	Ach sp.157	Ach sp.165	Ach spp	Ach sp. ellip	Adl fas	Adl 65-5	Adl sp.180	Adl spp.	Amph pel	Amp ovalis	Amp pediculus	Amp veneta	Amp 30-1	Amp 30-2	Amp 61-1	Amp 61-2	anp 37 36	Amp sp.119	Amp spp.
CRA-19-2FT-D1	1978	0	7	0	137	0	0	0	0	0	0	0	0	0	0	0	0	2	0	0	0	0	0	0	0	0	0	0	0	0	0	0	1	0	0	0	0	0	1	5	2	0	0	0	0	0	0	0	0
CRA-19-2FT-D1	1977	0	2	0	89	0	0	0	0	0	0	0	0	0	0	0	0	0	0	0	0	0	0	0	0	0	0	0	0	0	0	0	0	0	0	0	0	0	0	3	0	0	0	0	0	0	0	0	0
CRA-19-2FT-D1	1976	0	4	0	70	0	1	0	0	0	0	0	0	0	0	0	0	0	0	0	0	0	0	0	0	0	0	0	0	0	0	0	0	0	0	0	0	0	0	0	3	0	0	0	0	0	0	0	0
CRA-19-2FT-D1	1975	0	0	0	37	0	0	0	0	0	0	0	0	0	0	0	0	0	0	0	0	0	0	0	0	0	0	0	0	0	0	0	2	0	0	0	0	0	0	2	0	0	0	0	0	0	0	0	0
CRA-19-2FT-D1	1974	0	0	0	27	1	0	0	0	0	0	0	0	0	0	0	0	0	1	0	0	0	0	0	0	0	0	0	0	0	0	0	1	0	0	0	0	0	0	0	0	0	0	0	0	0	0	0	0
CRA-19-2FT-D1	1973	0	2	0	63	0	0	0	0	0	0	0	0	0	0	0	0	2	0	0	0	0	0	0	0	0	0	0	0	0	0	0	0	0	0	0	0	0	2	4	0	0	1	0	0	0	0	0	2
CRA-19-2FT-D1	1972	0	5	0	78	5	0	0	0	0	0	0	0	0	0	0	0	0	0	0	0	0	0	0	0	0	0	0	0	0	0	0	4	0	0	0	0	0	0	2	0	0	0	0	0	0	0	0	0
CRA-19-2FT-D1	1971	0	3	0	55	0	0	0	0	0	0	0	0	0	0	0	0	0	0	0	0	0	0	0	0	0	0	0	0	0	0	0	2	0	0	0	0	0	1	1	0	0	0	0	0	0	0	0	0
CRA-19-2FT-D1	1970	0	6	0	114	4	0	0	0	0	0	0	0	0	0	0	0	0	0	3	0	0	0	0	0	0	0	0	0	0	0	0	0	0	0	0	0	0	0	9	2	0	0	0	0	0	0	0	1
CRA-19-2FT-D1	1969	0	3	0	112	5	0	0	0	0	0	0	0	0	0	0	0	0	0	0	0	0	0	0	0	0	0	0	0	0	0	0	5	0	0	0	0	0	0	4	1	0	0	0	0	0	0	0	0
CRA-19-2FT-D1	1968	0	14	0	126	0	0	0	0	0	0	0	0	0	0	0	0	0	0	0	0	0	0	0	0	0	0	0	0	0	0	0	12	0	0	0	0	0	0	13	0	0	0	0	0	0	2	0	1
CRA-19-2FT-D1	1967	0	19	0	155	0	0	0	0	1	0	0	0	0	0	0	0	0	0	0	0	0	0	0	0	0	0	0	0	0	0	0	3	0	0	0	0	0	0	27	0	0	0	0	0	0	0	0	0
CRA-19-2FT-D1	1966a	0	6	0	152	2	0	0	0	0	0	0	0	0	1	0	0	0	0	0	0	0	0	0	0	0	0	0	0	0	0	0	3	0	0	0	0	0	0	9	1	1	0	0	0	0	0	0	0
CRA-19-2FT-D1	1966b	0	12	0	156	0	0	0	0	0	0	0	1	0	0	0	0	0	0	0	0	0	0	0	0	0	0	0	0	0	0	0	2	8	0	0	0	0	0	18	1	0	0	0	0	0	0	0	0
CRA-19-2FT-D1	1965	0	12	0	100	0	0	0	0	2	0	0	0	0	0	0	0	0	0	0	0	0	0	0	0	0	0	0	0	0	0	0	2	2	0	0	0	0	0	13	0	0	0	0	0	0	0	0	0
CRA-19-2FT-D1	1964	0	10	0	103	0	0	0	0	0	0	0	0	0	0	0	0	0	0	0	1	2	0	0	0	0	0	0	0	0	0	0	0	0	0	0	0	0	0	9	2	0	0	0	0	0	0	0	0
CRA-19-2FT-D1	1963	0	16	0	124	0	0	0	2	1	0	0	0	0	0	0	0	0	0	0	0	0	0	0	0	0	0	0	0	0	0	0	0	1	0	0	0	0	0	8	0	0	0	0	0	0	0	0	0
CRA-19-2FT-D1	1962	0	16	0	157	0	0	0	0	0	0	0	0	0	0	0	0	0	0	0	0	0	0	2	0	0	0	0	0	0	0	0	1	0	0	0	0	0	1	7	1	0	0	0	0	0	0	0	0
CRA-19-2FT-D1	1961a	0	10	0	113	2	0	0	0	0	0	0	0	0	0	0	0	0	0	0	0	0	0	0	0	0	0	0	0	0	0	0	3	0	0	0	0	0	1	10	1	0	0	0	0	0	0	0	0
CRA-19-2FT-D1	1961b	0	10	0	98	0	0	0	0	0	0	0	0	0	0	0	0	0	0	0	0	0	0	0	2	0	0	0	0	0	0	0	2	0	0	0	0	0	1	13	3	0	0	0	0	0	0	0	0
CRA-19-2FT-D1	1960	0	4	0	100	0	0	0	0	0	0	0	0	0	0	0	0	0	0	0	0	0	0	0	0	0	0	0	0	0	0	0	2	0	0	0	0	0	0	3	1	0	0	0	0	0	0	0	0
CRA-19-2FT-D1	1959	0	9	1	90	4	0	0	0	0	0	0	0	0	0	0	0	0	0	0	0	0	0	0	0	1	0	0	0	0	0	0	3	0	0	0	0	0	0	7	0	0	0	0	0	0	0	0	1
CRA-19-2FT-D1	1958	0	6	0	114	0	0	0	0	0	0	0	0	0	0	0	0	0	0	0	0	0	0	0	0	0	0	0	0	0	0	0	3	0	0	0	0	0	0	7	0	0	0	0	0	0	0	0	0
CRA-19-2FT-D1	1957	0	4	0	103	0	0	0	0	0	0	0	0	0	0	0	0	0	0	0	0	0	0	0	0	0	2	0	0	0	0	0	1	0	0	0	0	0	0	6	3	0	0	0	0	0	0	1	0
CRA-19-2FT-D1	1956	0	6	0	92	0	0	0	0	0	0	0	0	0	0	0	0	0	0	0	0	0	0	0	0	0	0	0	0	0	0	0	0	0	0	3	0	0	0	2	1	0	0	0	2	0	0	0	0
CRA-19-2FT-D1	1955	0	15	0	119	0	0	0	0	0	0	0	0	0	0	0	0	0	0	0	0	0	0	0	0	0	0	0	0	0	0	0	0	0	0	0	1	0	0	1	0	0	0	0	0	1	0	0	0
CRA-19-2FT-D1	1954	0	13	0	82	0	0	0	0	0	0	0	0	1	0	0	0	0	0	0	0	0	0	0	0	0	0	0	0	0	0	0	1	0	0	0	0	0	0	12	1	0	1	1	0	0	0	0	0
CRA-19-2FT-D1	1953	0	7	3	147	0	0	0	0	0	0	0	0	0	0	0	0	0	0	0	0	0	0	0	0	0	0	0	0	0	0	0	1	0	10	0	0	0	0	3	1	0	0	0	0	0	0	0	1
CRA-19-2FT-D1	1952	0	4	2	89	0	0	0	0	0	0	0	0	0	0	0	0	0	0	0	0	0	0	0	0	0	0	0	0	0	0	0	0	0	0	0	0	0	0	12	7	0	0	0	0	0	0	0	2
CRA-19-2FT-D1	1951	0	3	0	128	0	0	0	0	0	0	0	0	0	0	0	0	0	0	0	0	0	0	0	0	0	0	0	0	0	0	0	0	0	0	0	0	2	1	19	2	0	0	0	1	0	0	0	0
CRA-19-2FT-D1	1950	0	13	0	149	0	0	0	0	0	0	5	0	0	0	0	0	0	0	0	0	0	0	0	0	0	0	0	0	0	0	0	0	0	0	0	0	0	0	9	1	0	0	0	0	3	0	0	1
CRA-19-2FT-D1	1949	0	2	0	74	0	0	0	0	0	0	0	0	0	0	0	0	0	0	0	0	0	0	0	0	0	0	0	0	0	0	0	1	0	2	0	0	0	0	11	2	0	0	0	1	1	0	0	0
CRA-19-2FT-D1	1948a	2	9	0	44	12	0	0	0	0	0	0	0	0	0	0	0	0	0	0	0	0	0	0	0	0	0	0	0	0	0	0	0	0	0	0	0	0	0	4	1	1	0	0	0	0	0	0	0
CRA-19-2FT-D1	1948b	0	1	0	65	0	0	0	0	0	0	0	0	0	0	0	0	0	0	0	0	0	4	0	0	0	0	0	0	0	0	0	0	0	0	0	0	0	0	9	2	1	0	0	0	0	0	0	0
CRA-19-2FT-D1	1947	0	3	0	39	0	0	0	0	0	0	0	0	0	0	0	0	0	0	0	0	0	0	0	0	0	0	0	0	0	0	0	1	1	0	0	0	0	0	3	1	1	0	0	0	2	0	0	0
CRA-19-2FT-D1	1946	0	3	0	137	0	0	0	0	0	0	0	0	2	0	0	0	0	1	0	0	0	0	0	0	0	0	2	0	0	0	0	0	0	0	0	0	0	1	3	3	0	0	0	0	0	0	0	0
CRA-19-2FT-D1	1945	0	5	0	79	0	0	1	0	2	0	0	0	0	0	0	3	0	0	0	0	0	0	0	0	0	0	0	0	1	0	0	0	0	0	0	0	0	0	9	2	0	0	0	2	0	0	0	1
CRA-19-2FT-D1	1944	0	9	0	212	0	0	0	0	0	2	0	0	0	0	4	4	0	0	0	0	0	0	0	0	0	0	0	7	0	1	0	2	0	0	0	0	0	1	8	0	1	0	0	0	2	0	0	0
CRA-19-2FT-D1	1943	0	10	0	180	0	0	0	0	0	0	0	0	0	0	2	0	3	0	0	0	0	0	0	0	0	0	0	3	0	0	1	1	0	0	0	0	0	0	2	0	0	0	0	0	0	0	0	0
CRA-19-2FT-D1	1942	0	3	0	176	0	0	0	0	0	0	0	0	0	0	1	0	0	0	0	0	0	0	0	0	0	0	0	0	0	0	0	1	0	0	0	0	0	0	1	0	0	0	0	3	3	0	0	0
CRA-19-2FT-D1	1941	0	1	0	38	0	0	0	0	0	0	0	0	0	0	0	0	3	0	0	0	0	0	0	0	0	0	0	0	0	0	0	0	0	0	0	0	0	0	1	1	0	0	0	0	0	0	0	0
CRA-19-2FT-D1	1940	0	1	0	24	0	0	0	0	0	0	0	0	0	0	0	0	0	0	0	0	0	0	0	0	0	0	0	0	0	0	0	0	0	0	0	0	0	0	0	1	0	0	0	4	0	0	0	0
CRA-19-2FT-D1	1939	0	0	0	34	0	0	0	0	0	0	0	0	0	0	0	0	0	0	0	0	0	0	0	0	0	0	0	0	0	0	0	0	0	0	0	0	0	0	0	0	1	0	0	0	0	0	0	0
CRA-19-2FT-D1	1938	0	0	0	11	0	0	0	0	0	0	0	0	0	0	0	0	0	0	0	0	0	0	0	0	0	0	0	0	0	0	0	0	0	0	0	0	0	0	0	0	0	0	1	0	0	0	0	0
CRA-19-2FT-D1	1937	0	0	0	12	0	0	0	0	0	0	0	0	0	0	0	0	0	0	0	0	0	0	0	0	0	0	0	0	0	0	0	0	0	0	0	0	0	0	0	0	0	0	0	0	0	0	0	0
CRA-19-2FT-D1	1936	0	0	0	13	0	0	0	0	0	0	0	0	0	0	0	0	0	0	0	0	0	0	0	0	0	0	0	0	0	0	0	0	0	0	0	0	0	0	0	0	0	1	0	0	0	0	0	0
CRA-19-2FT-D1	1935	0	4	0	10	0	0	0	0	0	0	0	0	0	0	0	0	0	0	0	0	0	0	0	0	0	0	0	0	0	0	0	0	0	0	0	0	0	0	0	0	0	2	0	0	0	0	0	0
CRA-19-2FT-D1	1934	0	3	0	17	0	0	0	0	0	0	0	0	0	0	0	0	0	0	0	0	0	0	0	0	0	0	0	0	0	0	0	0	0	0	0	0	0	0	0	0	1	0	1	0	0	0	0	0
CRA-19-2FT-D1	1933	0	2	0	33	0	0	0	0	0	0	0	0	0	0	0	0	0	0	0	0	0	0	0	0	0	0	0	0	0	0	0	1	0	0	0	0	0	0	0	0	0	0	0	0	0	0	0	0
CRA-19-2FT-D1	1932	0	1	0	12	0	0	0	0	0	0	0	0	0	0	0	0	0	0	0	0	0	0	0	0	0	0	0	0	0	0	0	1	0	0	0	0	0	1	0	0	0	0	0	0	0	0	0	0
CRA-19-2FT-D1	1931	0	1	0	23	0	0	0	0	0	0	0	0	0	0	0	0	0	0	0	0	0	0	0	0	0	0	0	0	0	0	0	0	0	0	0	0	0	0	2	0	0	0	2	0	0	0	0	0
CRA-19-2FT-D1	1930	0	1	0	21	0	0	0	0	0	0	0	0	0	0	0	0	0	0	0	0	0	0	0	0	0	0	0	0	0	0	0	0	0	0	0	0	0	1	2	0	0	0	0	0	0	0	0	0
	Total taxon counts	2	300	6	4533	35	1	1	2	6	2	5	1	3	1	7	7	10	2	3	1	2	4	2	2	1	2	2	10	1	1	1	62	12	12	3	1	2	12	293	47	7	5	5	13	12	2	1	10
[truncated: 325 more columns]

## Sheet: selected counts
Sample Code	ID	Ach.cal	Ach.min	Achn.micro	Ach.spp	Ach.sp..ellip.	Adl.fas	Amp.ovalis	Aul.ita	Bra.micr	Lin.aff	CYC.dist	Lin_mich	Cym.lun	Cym.vulg	Cym.73.1	Cym.gir	Cymbo.sp...narrow.	Cymbo.152..28.1.	Den.eleg	Dis.stell	Dis.spp..44.	Encp.alp	Encp.cistif	Encp.kram	Encp.min.mico	Enc.lun..1.	enc.sbro	Enc.gracile	Encp.lap	Eun.mon	Eun.gir	Fra.acul	Fra.acusl	Fra.cnst	Fra.crot	Fra.ande	Fra.grac	Fra.grcc	Fra.bin	Frag.smll	Fra.24	Fra.spp	Fra.vau	Frag.vauC	Fra.gir	Gom.variostriata	Gom.gir	Gom.46.1
CRA-19-2FT-D1	1978	7	137	0	1	0	0	5	2	10	0	105	12	0	10	0	0	0	0	4	24	0	4	4	29	14	0	19	0	0	1	2	14	1	1	2	22	15	9	2	0	0	2	41	5	2	22	13	1
CRA-19-2FT-D1	1977	2	89	0	0	0	0	3	5	7	10	73	6	0	5	0	0	0	0	0	0	0	0	5	11	14	0	13	0	0	1	0	43	0	12	2	200	19	11	1	0	0	0	47	0	0	10	13	0
CRA-19-2FT-D1	1976	4	70	0	0	0	0	0	0	9	20	35	4	0	0	0	0	0	0	0	1	0	0	1	0	7	0	9	0	0	1	0	32	0	0	6	367	8	0	1	0	0	13	36	0	0	7	0	0
CRA-19-2FT-D1	1975	0	37	0	2	0	0	2	0	3	26	19	1	0	0	0	0	0	0	0	0	1	8	0	0	6	0	4	0	0	0	0	0	0	0	1	378	31	0	0	0	0	10	8	0	0	2	0	0
CRA-19-2FT-D1	1974	0	27	1	1	0	0	0	0	4	83	9	1	0	0	0	0	0	0	1	0	13	1	0	0	5	0	8	0	0	0	0	0	0	0	24	318	59	0	0	9	0	0	0	0	0	6	2	0
CRA-19-2FT-D1	1973	2	63	0	0	0	0	4	0	6	64	108	7	0	9	0	0	0	0	1	1	0	0	3	9	10	0	1	0	0	0	0	12	0	0	4	144	137	6	0	0	0	0	26	9	33	9	5	0
CRA-19-2FT-D1	1972	5	78	5	4	0	0	2	0	8	56	37	8	0	2	0	0	0	0	4	1	8	3	4	0	13	0	18	0	0	0	0	1	0	0	59	128	48	0	0	0	0	5	92	0	0	25	0	0
CRA-19-2FT-D1	1971	3	55	0	2	0	0	1	0	3	94	34	1	0	2	0	0	0	0	1	0	0	7	0	1	10	0	5	0	0	0	0	1	0	0	13	76	39	0	0	0	0	7	15	0	0	20	0	0
CRA-19-2FT-D1	1970	6	114	4	0	0	0	9	2	9	97	81	6	0	2	0	0	0	0	0	0	0	9	7	2	27	0	7	0	0	0	0	5	0	11	6	9	52	0	0	0	9	6	66	0	0	18	0	0
CRA-19-2FT-D1	1969	3	112	5	5	0	0	4	0	8	93	137	0	0	4	0	0	0	0	1	1	1	3	1	0	30	0	8	0	0	0	0	0	0	2	23	8	3	0	0	0	0	0	55	0	0	16	0	0
CRA-19-2FT-D1	1968	14	126	0	12	0	0	13	0	23	48	200	4	0	8	0	0	0	0	5	0	0	1	3	16	24	0	17	0	0	0	0	7	0	0	3	11	2	0	0	0	0	0	20	1	0	15	0	0
CRA-19-2FT-D1	1967	19	155	0	3	0	0	27	2	23	1	161	6	8	11	0	0	0	0	4	0	1	2	7	0	23	0	26	0	0	2	3	17	0	1	6	18	1	4	0	0	0	1	22	4	2	29	6	0
CRA-19-2FT-D1	1966a	6	152	2	3	0	0	9	0	10	0	92	0	0	5	0	0	0	0	0	0	1	9	1	0	38	6	13	0	0	0	2	0	0	6	22	33	5	0	0	0	0	3	8	0	0	26	0	0
CRA-19-2FT-D1	1966b	12	156	0	2	8	0	18	2	16	0	113	0	0	7	0	0	0	0	3	2	4	11	0	0	53	0	20	0	0	0	4	12	0	4	7	25	0	0	0	0	0	0	25	0	0	32	2	0
CRA-19-2FT-D1	1965	12	100	0	2	2	0	13	0	13	0	33	4	0	5	0	0	0	0	2	0	2	22	0	0	21	0	11	0	0	0	4	17	0	1	14	77	0	0	0	0	0	1	24	0	2	19	0	0
CRA-19-2FT-D1	1964	10	103	0	0	0	0	9	0	6	1	82	0	0	7	0	3	0	0	1	0	5	10	6	0	7	0	16	0	0	0	8	10	0	7	9	24	0	0	0	0	0	0	18	2	4	16	8	0
CRA-19-2FT-D1	1963	16	124	0	0	1	0	8	0	16	1	109	3	0	7	0	0	0	0	0	2	2	2	0	0	27	0	24	0	0	0	0	28	0	6	15	34	9	0	0	0	0	0	47	0	0	19	0	0
CRA-19-2FT-D1	1962	16	157	0	1	0	0	7	2	15	0	77	6	0	9	0	0	0	0	2	0	0	3	9	2	30	3	18	0	0	0	0	21	0	8	16	37	11	0	0	0	0	0	28	0	0	7	0	0
CRA-19-2FT-D1	1961a	10	113	2	3	0	0	10	0	9	0	64	12	0	9	0	0	0	0	6	0	0	9	9	14	12	0	14	0	0	0	0	4	0	2	25	88	8	0	0	0	0	0	46	0	0	21	0	0
CRA-19-2FT-D1	1961b	10	98	0	2	0	0	13	0	10	1	72	14	0	20	0	0	0	0	5	0	2	9	6	0	9	12	10	0	0	0	0	16	0	2	20	89	6	0	0	0	0	4	22	0	0	36	0	0
CRA-19-2FT-D1	1960	4	100	0	2	0	0	3	0	11	0	77	7	0	18	0	0	0	0	4	0	4	4	5	0	19	18	10	0	0	0	0	8	0	0	3	125	6	0	0	0	0	1	41	0	0	2	0	0
CRA-19-2FT-D1	1959	9	90	4	3	0	0	7	1	13	0	82	10	0	11	0	1	0	0	7	1	6	9	4	0	40	20	18	0	0	0	0	22	0	1	6	57	12	0	0	0	0	2	41	0	0	12	0	0
CRA-19-2FT-D1	1958	6	114	0	3	0	0	7	0	16	0	29	4	0	8	0	4	0	0	12	1	6	6	5	0	22	30	26	0	0	0	0	18	0	1	15	81	0	13	0	0	0	0	12	0	0	33	0	0
CRA-19-2FT-D1	1957	4	103	0	1	0	0	6	1	18	0	21	8	0	4	0	0	0	0	3	4	1	7	10	0	32	22	17	0	0	0	0	1	0	15	3	182	0	12	0	0	0	0	71	0	0	19	0	0
CRA-19-2FT-D1	1956	6	92	0	0	0	0	2	2	12	0	4	1	0	15	0	0	0	0	6	0	8	4	6	0	34	22	6	0	0	0	2	10	0	9	6	118	9	0	0	0	0	0	165	0	0	21	0	0
CRA-19-2FT-D1	1955	15	119	0	0	0	0	1	1	8	0	26	0	0	2	0	0	9	0	4	0	2	7	1	0	14	0	17	0	0	0	0	10	0	0	12	20	3	0	0	0	0	6	40	0	11	0	0	21
CRA-19-2FT-D1	1954	13	82	0	1	0	0	12	20	14	0	27	6	0	14	0	0	0	0	13	0	0	12	9	0	32	2	23	0	0	4	3	7	0	2	13	3	2	1	2	0	0	0	68	1	0	17	2	0
CRA-19-2FT-D1	1953	7	147	0	1	0	10	3	6	31	0	25	18	0	13	0	0	0	0	5	2	3	7	2	3	25	32	10	0	0	1	0	12	0	5	13	13	8	0	0	0	0	0	23	0	0	23	0	0
CRA-19-2FT-D1	1952	4	89	0	0	0	0	12	15	8	0	54	94	0	6	0	0	0	0	5	50	2	2	4	0	22	22	16	0	0	1	8	61	0	5	41	48	0	0	0	0	0	0	19	0	0	10	0	0
CRA-19-2FT-D1	1951	3	128	0	0	0	0	19	0	21	0	36	34	0	14	0	0	0	0	4	5	0	6	8	6	25	20	16	0	0	2	6	74	0	4	24	89	0	3	5	0	0	1	50	0	0	20	0	0
CRA-19-2FT-D1	1950	13	149	0	0	0	0	9	11	19	0	39	24	0	10	0	0	1	0	9	0	0	1	6	0	33	0	37	0	0	0	5	17	0	1	26	166	0	10	0	0	0	0	52	0	0	9	0	0
CRA-19-2FT-D1	1949	2	74	0	1	0	2	11	6	9	3	29	29	0	4	0	0	0	0	1	1	0	4	8	3	23	21	12	0	0	11	0	57	0	0	21	80	13	0	3	0	0	3	31	0	0	11	0	0
CRA-19-2FT-D1	1948a	9	44	12	0	0	0	4	6	6	0	61	21	0	5	0	0	0	0	3	0	0	0	12	0	31	0	0	15	9	4	0	11	0	0	23	100	0	0	0	6	0	0	9	0	0	6	0	0
CRA-19-2FT-D1	1948b	1	65	0	0	0	0	9	1	2	0	45	15	8	13	0	0	0	0	0	0	1	3	11	7	20	0	9	0	0	1	0	59	0	3	22	92	7	0	2	0	0	0	22	0	0	5	0	0
CRA-19-2FT-D1	1947	3	39	0	1	1	0	3	6	2	0	7	8	7	8	0	0	0	0	2	0	0	0	4	0	6	6	1	0	0	1	0	21	0	0	33	391	52	0	0	0	0	0	28	0	0	7	0	0
CRA-19-2FT-D1	1946	3	137	0	0	0	0	3	8	5	0	14	14	0	11	0	0	0	0	2	0	0	0	2	7	10	8	8	0	0	5	3	22	0	1	28	172	0	0	1	0	0	1	80	0	67	7	2	0
CRA-19-2FT-D1	1945	5	79	0	0	0	0	9	21	11	0	41	44	0	6	0	4	0	0	7	5	1	0	5	1	4	9	7	0	0	6	0	18	0	8	242	69	9	0	2	0	0	0	59	0	0	1	0	0
CRA-19-2FT-D1	1944	9	212	0	2	0	0	8	8	17	0	19	24	0	5	0	0	0	9	9	0	2	0	0	4	14	15	33	0	0	15	0	25	0	4	30	26	10	0	9	0	0	0	40	14	0	7	0	0
CRA-19-2FT-D1	1943	10	180	0	1	0	0	2	10	30	0	32	20	13	3	0	0	6	0	7	7	0	2	0	0	20	6	8	0	0	7	0	10	0	0	38	25	7	0	2	0	0	3	44	0	0	8	0	1
CRA-19-2FT-D1	1942	3	176	0	1	0	0	1	2	22	0	42	42	18	8	8	2	0	0	4	3	1	0	5	5	8	0	29	0	0	6	0	20	0	1	182	50	0	5	0	0	0	0	16	0	0	2	0	1
CRA-19-2FT-D1	1941	1	38	0	0	0	0	1	0	1	1	45	106	1	0	0	8	0	0	0	14	0	0	4	0	3	0	9	0	0	0	0	20	0	0	546	150	0	3	0	0	0	0	2	0	0	0	0	2
CRA-19-2FT-D1	1940	1	24	0	0	0	0	0	0	0	0	81	94	0	2	0	0	0	0	0	29	0	0	0	0	4	0	9	0	0	0	0	7	0	0	262	80	0	5	0	0	0	0	13	0	0	1	0	0
CRA-19-2FT-D1	1939	0	34	0	0	0	0	0	0	1	0	63	86	0	0	0	0	0	0	4	30	0	0	2	0	1	0	13	0	0	0	0	39	0	0	197	163	0	3	0	0	0	0	0	0	0	0	0	0
CRA-19-2FT-D1	1938	0	11	0	0	0	0	0	0	0	2	111	128	0	2	0	0	0	0	0	106	0	0	0	0	2	0	0	0	0	0	0	40	0	0	156	79	3	5	0	0	0	1	0	0	6	0	0	0
CRA-19-2FT-D1	1937	0	12	0	0	0	0	0	0	2	0	73	208	0	0	0	0	0	0	0	68	0	0	0	0	0	0	7	0	0	0	0	125	0	0	82	94	0	6	0	0	0	0	0	0	13	1	0	0
CRA-19-2FT-D1	1936	0	13	0	0	0	0	0	0	1	0	64	217	0	4	0	0	0	0	0	23	0	0	1	0	3	0	5	0	0	0	0	271	0	0	81	82	1	2	0	0	0	4	0	0	2	0	0	0
CRA-19-2FT-D1	1935	4	10	0	0	0	0	0	0	0	0	34	250	0	2	0	2	0	0	0	3	0	0	4	0	0	0	0	0	0	0	0	229	51	1	61	44	0	0	0	0	0	1	0	1	33	0	0	0
CRA-19-2FT-D1	1934	3	17	0	0	0	0	0	0	0	0	87	188	0	1	0	0	0	0	0	0	0	0	0	0	4	0	0	0	0	0	0	97	0	0	60	175	0	9	0	0	0	0	2	0	0	0	0	0
CRA-19-2FT-D1	1933	2	33	0	1	0	0	0	0	0	0	90	141	0	3	0	0	0	0	0	0	0	0	0	0	8	0	0	0	0	0	0	94	0	0	185	45	0	32	0	0	0	0	0	0	5	1	0	0
CRA-19-2FT-D1	1932	1	12	0	1	0	0	0	0	1	0	129	68	0	1	0	0	2	0	0	0	0	0	1	0	3	0	1	0	0	0	0	6	0	0	273	19	0	27	0	0	0	0	3	0	20	1	2	0
CRA-19-2FT-D1	1931	1	23	0	0	0	0	2	0	0	0	122	99	0	0	0	0	2	0	0	1	0	0	0	0	14	0	8	0	0	1	0	38	0	0	240	60	0	30	0	0	0	0	1	0	17	0	0	0
CRA-19-2FT-D1	1930	1	21	0	0	0	0	2	0	1	0	106	197	0	1	1	0	0	0	0	11	0	0	0	0	4	0	2	0	0	0	0	55	0	0	100	90	0	24	0	0	0	3	1	0	18	0	0	0
[truncated: 22 more columns]
