# Supplementary material for: Annual-scale assessment of mid-20th century anthropogenic impacts on the algal ecology of Crawford Lake, Ontario, Canada
Source: PeerJ. 2023 Mar 8;11:e14847. doi: 10.7717/peerj.14847 (PMC10007962; doi:10.7717/peerj.14847)
Supplement: Supplemental Information 3 — Summary of weather data for the TORONTO LESTER B. PEARSON INT’L A weather station (6158733, Long.: -79.63, Lat.: 43.68) from 1938–1990. Data retrieved from Environment Canada, 01-Nov-2022 ( https://climate.weather.gc.ca/) [file peerj-11-14847-s003.xls]

## Sheet: en_climate_monthly_ON_6158733_1
Longitude (x)	Latitude (y)	Station Name	Climate ID	Date/Time	Year	Month	Mean Temp (°C)	Total Rain (mm)	Total Snow (cm)				Total Rain (mm)	Total Rain Flag	Total Snow (cm)	Total Snow Flag	Total Precip (mm)	Total Precip Flag	Snow Grnd Last Day (cm)	Snow Grnd Last Day Flag	Dir of Max Gust (10's deg)	Dir of Max Gust Flag	Spd of Max Gust (km/h)	Date	Parameter	Total Rain (mm)	Total Rain Flag	Total Snow (cm)	Total Snow Flag	Total Precip (mm)	Total Precip Flag	Snow Grnd Last Day (cm)	Snow Grnd Last Day Flag	Dir of Max Gust (10's deg)	Dir of Max Gust Flag	Spd of Max Gust (km/h)	Spd of Max Gust Flag
-79.63	43.68	TORONTO LESTER B. PEARSON INT'L A	6158733	1937-01-01	1937	1																		1940s	min	524.9	0	88.7	0	628.9	0	0	0	0	0	0
-79.63	43.68	TORONTO LESTER B. PEARSON INT'L A	6158733	1937-02-01	1937	2																			max	849.4	0	183.7	0	962.9	0	63	0	0	0	0
-79.63	43.68	TORONTO LESTER B. PEARSON INT'L A	6158733	1937-03-01	1937	3																			median	631	0	128.2	0	780.6	0	0	0	0	0	0
-79.63	43.68	TORONTO LESTER B. PEARSON INT'L A	6158733	1937-04-01	1937	4																			average	665.37	0	133.64	0	798.95	0	9.2	0	0	0	0
-79.63	43.68	TORONTO LESTER B. PEARSON INT'L A	6158733	1937-05-01	1937	5																		1950s	min	381.8	0	77.8	0	506.9	0	0	0	0	0	0
-79.63	43.68	TORONTO LESTER B. PEARSON INT'L A	6158733	1937-06-01	1937	6																			max	796.3	0	215.1	0	914.4	0	26	0	337	0	1013
-79.63	43.68	TORONTO LESTER B. PEARSON INT'L A	6158733	1937-07-01	1937	7																			median	620.7	0	118.1	0	770.5	0	16	0	0	0	0
-79.63	43.68	TORONTO LESTER B. PEARSON INT'L A	6158733	1937-08-01	1937	8																			average	611.144	0	128.711	0	739.844	0	14.3333	0	74	0	218.667
-79.63	43.68	TORONTO LESTER B. PEARSON INT'L A	6158733	1937-09-01	1937	9																		1960s	min	456.9	0	116.3	0	565.4	0	10	0	267	0	791
-79.63	43.68	TORONTO LESTER B. PEARSON INT'L A	6158733	1937-10-01	1937	10																			max	761.1	0	168.2	0	890.8	0	49	0	333	0	985
-79.63	43.68	TORONTO LESTER B. PEARSON INT'L A	6158733	1937-11-01	1937	11	3.3	33.8	0																median	598.6	0	142.3	0	722.7	0	28	0	299	0	893
-79.63	43.68	TORONTO LESTER B. PEARSON INT'L A	6158733	1937-12-01	1937	12	-4.4	7.6	33.8																average	612.222	0	140.722	0	746.1	0	29.2222	0	301.222	0	893.556
													41.4	0	33.8	0	75.2	0	0	0	0	0	0	1970s	min	546.8	0	92.3	0	672.9	0	0	0	285
-79.63	43.68	TORONTO LESTER B. PEARSON INT'L A	6158733	1938-01-01	1938	1	-7.2	13.5	26.9																max	852.9	0	204.8	0	971.3	0	43	0	339
-79.63	43.68	TORONTO LESTER B. PEARSON INT'L A	6158733	1938-02-01	1938	2	-3.7	63.2	13.2																median	662.1	0	144.3	0	792.4	0	23	0	314
-79.63	43.68	TORONTO LESTER B. PEARSON INT'L A	6158733	1938-03-01	1938	3	1.4	35.3	6.4																average	670.656	0	140.633	0	799.478	0	24.8889	0	309.556	0	893.778
-79.63	43.68	TORONTO LESTER B. PEARSON INT'L A	6158733	1938-04-01	1938	4	7.6	21.8	11.4		;l.;l													1980s	min	531.5	0	70.6	0	604	0	4	0	244	0	758
-79.63	43.68	TORONTO LESTER B. PEARSON INT'L A	6158733	1938-05-01	1938	5	12.1	72.4	0																max	873.6	0	167.4	0	951.2	0	35	0	330	0	973
-79.63	43.68	TORONTO LESTER B. PEARSON INT'L A	6158733	1938-06-01	1938	6	17.3	42.2	0																median	716.3	0	94.2	0	795.6	0	16	0	314	0	870
-79.63	43.68	TORONTO LESTER B. PEARSON INT'L A	6158733	1938-07-01	1938	7	21.8	63.2	0																average	701.544	0	102.333	0	800.067	0	15.6667	0	302.889	0	866.778
-79.63	43.68	TORONTO LESTER B. PEARSON INT'L A	6158733	1938-08-01	1938	8	22.7	37.1	0															1990s	min	381.8	0	70.6	0	506.9	0	0	0	0	0	0
-79.63	43.68	TORONTO LESTER B. PEARSON INT'L A	6158733	1938-09-01	1938	9	14.2	102.1	0		17.62														max	873.6	0	215.1	0	971.3	0	63	0	353	0	1013
-79.63	43.68	TORONTO LESTER B. PEARSON INT'L A	6158733	1938-10-01	1938	10	9.9	7.1	0																median	650.735	0	125.25	0	779.4	0	17	0	291.5	0	856.5
-79.63	43.68	TORONTO LESTER B. PEARSON INT'L A	6158733	1938-11-01	1938	11	3.2	30.5	2.5																average	654.377	0	122.847	0	769.189	0	22.9706	0	230.869	0	687.39
-79.63	43.68	TORONTO LESTER B. PEARSON INT'L A	6158733	1938-12-01	1938	12	-2.5	13.7	13.7
-79.63	43.68	TORONTO LESTER B. PEARSON INT'L A		1905-04-21									502.1	0	74.1	0	576.4	0	0	0	0	0	0
-79.63	43.68	TORONTO LESTER B. PEARSON INT'L A	6158733	1939-01-01	1939	1	-6.7	2.5	45.7
-79.63	43.68	TORONTO LESTER B. PEARSON INT'L A	6158733	1939-02-01	1939	2	-5.8	30.2	57.9
-79.63	43.68	TORONTO LESTER B. PEARSON INT'L A	6158733	1939-03-01	1939	3	-3.6	26.2	54.4
-79.63	43.68	TORONTO LESTER B. PEARSON INT'L A	6158733	1939-04-01	1939	4	4.1	57.7	32.5
-79.63	43.68	TORONTO LESTER B. PEARSON INT'L A	6158733	1939-05-01	1939	5	13.9	26.4	0
-79.63	43.68	TORONTO LESTER B. PEARSON INT'L A	6158733	1939-06-01	1939	6	18	51.8	0
-79.63	43.68	TORONTO LESTER B. PEARSON INT'L A	6158733	1939-07-01	1939	7	20.9	39.4	0
-79.63	43.68	TORONTO LESTER B. PEARSON INT'L A	6158733	1939-08-01	1939	8	21.7	51.6	0		15.72
-79.63	43.68	TORONTO LESTER B. PEARSON INT'L A	6158733	1939-09-01	1939	9
-79.63	43.68	TORONTO LESTER B. PEARSON INT'L A	6158733	1939-10-01	1939	10
-79.63	43.68	TORONTO LESTER B. PEARSON INT'L A	6158733	1939-11-01	1939	11
-79.63	43.68	TORONTO LESTER B. PEARSON INT'L A	6158733	1939-12-01	1939	12
											18.625		285.8	0	190.5	0	476.3	0	0	0	226.9	0	0
-79.63	43.68	TORONTO LESTER B. PEARSON INT'L A	6158733	1940-01-01	1940	1	-9.4	26.7	21.6
-79.63	43.68	TORONTO LESTER B. PEARSON INT'L A	6158733	1940-02-01	1940	2	-6.2	6.9	27.2
-79.63	43.68	TORONTO LESTER B. PEARSON INT'L A	6158733	1940-03-01	1940	3	-5.2	13.2	35.1
-79.63	43.68	TORONTO LESTER B. PEARSON INT'L A	6158733	1940-04-01	1940	4	4.1	45.5	5.3
-79.63	43.68	TORONTO LESTER B. PEARSON INT'L A	6158733	1940-05-01	1940	5	11.7	123.4	0
-79.63	43.68	TORONTO LESTER B. PEARSON INT'L A	6158733	1940-06-01	1940	6	16.6	86.1	0
-79.63	43.68	TORONTO LESTER B. PEARSON INT'L A	6158733	1940-07-01	1940	7	20.5	70.9	0
-79.63	43.68	TORONTO LESTER B. PEARSON INT'L A	6158733	1940-08-01	1940	8	19.4	84.1	0
-79.63	43.68	TORONTO LESTER B. PEARSON INT'L A	6158733	1940-09-01	1940	9	15.1	102.4	0
-79.63	43.68	TORONTO LESTER B. PEARSON INT'L A	6158733	1940-10-01	1940	10	7.4	45.5	0
-79.63	43.68	TORONTO LESTER B. PEARSON INT'L A	6158733	1940-11-01	1940	11	2.2	53.3	61
-79.63	43.68	TORONTO LESTER B. PEARSON INT'L A	6158733	1940-12-01	1940	12	-3.6	68.1	14.5
											16.66		726.1	0	164.7	0	890.7	0	0	0	0	0	0
-79.63	43.68	TORONTO LESTER B. PEARSON INT'L A	6158733	1941-01-01	1941	1	-6.9	21.1	50
-79.63	43.68	TORONTO LESTER B. PEARSON INT'L A	6158733	1941-02-01	1941	2	-6.2	6.4	24.6
-79.63	43.68	TORONTO LESTER B. PEARSON INT'L A	6158733	1941-03-01	1941	3	-3.8	23.6	13.2
-79.63	43.68	TORONTO LESTER B. PEARSON INT'L A	6158733	1941-04-01	1941	4	9.2	45	0
-79.63	43.68	TORONTO LESTER B. PEARSON INT'L A	6158733	1941-05-01	1941	5	13.9	53.8	0
-79.63	43.68	TORONTO LESTER B. PEARSON INT'L A	6158733	1941-06-01	1941	6	19.3	75.7	0
-79.63	43.68	TORONTO LESTER B. PEARSON INT'L A	6158733	1941-07-01	1941	7	21.5	68.1	0
-79.63	43.68	TORONTO LESTER B. PEARSON INT'L A	6158733	1941-08-01	1941	8	19.5	39.4	0
-79.63	43.68	TORONTO LESTER B. PEARSON INT'L A	6158733	1941-09-01	1941	9	16.8	25.1	0
-79.63	43.68	TORONTO LESTER B. PEARSON INT'L A	6158733	1941-10-01	1941	10	10	89.2	0
-79.63	43.68	TORONTO LESTER B. PEARSON INT'L A	6158733	1941-11-01	1941	11	4.7	52.6	0
-79.63	43.68	TORONTO LESTER B. PEARSON INT'L A	6158733	1941-12-01	1941	12	-1.5	24.9	16.3
											18.2		524.9	0	104.1	0	628.9	0	445.3	0	#REF!	0	0
-79.63	43.68	TORONTO LESTER B. PEARSON INT'L A	6158733	1942-01-01	1942	1	-5.5	21.8	15.2
-79.63	43.68	TORONTO LESTER B. PEARSON INT'L A	6158733	1942-02-01	1942	2	-7.7	13	28.2
-79.63	43.68	TORONTO LESTER B. PEARSON INT'L A	6158733	1942-03-01	1942	3	1.4	94	23.1
-79.63	43.68	TORONTO LESTER B. PEARSON INT'L A	6158733	1942-04-01	1942	4	8.9	29.7	13.7
-79.63	43.68	TORONTO LESTER B. PEARSON INT'L A	6158733	1942-05-01	1942	5	12.9	208.5	0
-79.63	43.68	TORONTO LESTER B. PEARSON INT'L A	6158733	1942-06-01	1942	6	17.8	32.8	0
-79.63	43.68	TORONTO LESTER B. PEARSON INT'L A	6158733	1942-07-01	1942	7	20.2	110	0
-79.63	43.68	TORONTO LESTER B. PEARSON INT'L A	6158733	1942-08-01	1942	8	19.7	28.7	0
-79.63	43.68	TORONTO LESTER B. PEARSON INT'L A	6158733	1942-09-01	1942	9	15.1	99.8	0
-79.63	43.68	TORONTO LESTER B. PEARSON INT'L A	6158733	1942-10-01	1942	10	9.5	56.4	0
-79.63	43.68	TORONTO LESTER B. PEARSON INT'L A	6158733	1942-11-01	1942	11	2.8	58.4	19.6
-79.63	43.68	TORONTO LESTER B. PEARSON INT'L A	6158733	1942-12-01	1942	12	-5.6	56.4	53.6
											17.14		809.5	0	153.4	0	962.9	0	651.3	0	#REF!	0	0
-79.63	43.68	TORONTO LESTER B. PEARSON INT'L A	6158733	1943-01-01	1943	1	-9.1	2.5	68.3
-79.63	43.68	TORONTO LESTER B. PEARSON INT'L A	6158733	1943-02-01	1943	2	-5.2	32.3	16.5
-79.63	43.68	TORONTO LESTER B. PEARSON INT'L A	6158733	1943-03-01	1943	3	-3.1	67.1	18.3
-79.63	43.68	TORONTO LESTER B. PEARSON INT'L A	6158733	1943-04-01	1943	4	2.8	50.8	5.8
-79.63	43.68	TORONTO LESTER B. PEARSON INT'L A	6158733	1943-05-01	1943	5	12.1	104.4	0
-79.63	43.68	TORONTO LESTER B. PEARSON INT'L A	6158733	1943-06-01	1943	6	20.1	45.2	0
-79.63	43.68	TORONTO LESTER B. PEARSON INT'L A	6158733	1943-07-01	1943	7	21	86.6	0
-79.63	43.68	TORONTO LESTER B. PEARSON INT'L A	6158733	1943-08-01	1943	8	19.9	49.3	0
-79.63	43.68	TORONTO LESTER B. PEARSON INT'L A	6158733	1943-09-01	1943	9	14.5	35.1	0
-79.63	43.68	TORONTO LESTER B. PEARSON INT'L A	6158733	1943-10-01	1943	10	8.3	73.4	0
-79.63	43.68	TORONTO LESTER B. PEARSON INT'L A	6158733	1943-11-01	1943	11	1.9	29.2	11.4
-79.63	43.68	TORONTO LESTER B. PEARSON INT'L A	6158733	1943-12-01	1943	12	-4.8	10.7	4.8
											17.52		586.6	0	125.1	0	711.7	0	501.7	0	#REF!	0	0
-79.63	43.68	TORONTO LESTER B. PEARSON INT'L A	6158733	1944-01-01	1944	1	-2.7	10.4	9.7
-79.63	43.68	TORONTO LESTER B. PEARSON INT'L A	6158733	1944-02-01	1944	2	-6	5.8	57.4
-79.63	43.68	TORONTO LESTER B. PEARSON INT'L A	6158733	1944-03-01	1944	3	-3.6	53.3	28.2
-79.63	43.68	TORONTO LESTER B. PEARSON INT'L A	6158733	1944-04-01	1944	4	4.3	71.1	11.7
-79.63	43.68	TORONTO LESTER B. PEARSON INT'L A	6158733	1944-05-01	1944	5	15.2	137.9	0
-79.63	43.68	TORONTO LESTER B. PEARSON INT'L A	6158733	1944-06-01	1944	6	18.6	102.4	0
-79.63	43.68	TORONTO LESTER B. PEARSON INT'L A	6158733	1944-07-01	1944	7	21	90.2	0
-79.63	43.68	TORONTO LESTER B. PEARSON INT'L A	6158733	1944-08-01	1944	8	21.3	54.9	0
-79.63	43.68	TORONTO LESTER B. PEARSON INT'L A	6158733	1944-09-01	1944	9	15.8	64	0
-79.63	43.68	TORONTO LESTER B. PEARSON INT'L A	6158733	1944-10-01	1944	10	8.9	17.5	0
-79.63	43.68	TORONTO LESTER B. PEARSON INT'L A	6158733	1944-11-01	1944	11	3.3	30.5	12.2
-79.63	43.68	TORONTO LESTER B. PEARSON INT'L A	6158733	1944-12-01	1944	12	-5.7	6.1	64.5
											18.38		644.1	0	183.7	0	827.8	0	696.9	0	#REF!	0	0
-79.63	43.68	TORONTO LESTER B. PEARSON INT'L A	6158733	1945-01-01	1945	1	-11.9	0.3	39.9
-79.63	43.68	TORONTO LESTER B. PEARSON INT'L A	6158733	1945-02-01	1945	2	-6	13.2	34.5
-79.63	43.68	TORONTO LESTER B. PEARSON INT'L A	6158733	1945-03-01	1945	3	5.1	110.7	3.3
-79.63	43.68	TORONTO LESTER B. PEARSON INT'L A	6158733	1945-04-01	1945	4	7.7	75.7	7.4
-79.63	43.68	TORONTO LESTER B. PEARSON INT'L A	6158733	1945-05-01	1945	5	9.4	145	0
-79.63	43.68	TORONTO LESTER B. PEARSON INT'L A	6158733	1945-06-01	1945	6	16.7	81.3	0
-79.63	43.68	TORONTO LESTER B. PEARSON INT'L A	6158733	1945-07-01	1945	7	19.7	118.1	0
-79.63	43.68	TORONTO LESTER B. PEARSON INT'L A	6158733	1945-08-01	1945	8	19.9	49	0
-79.63	43.68	TORONTO LESTER B. PEARSON INT'L A	6158733	1945-09-01	1945	9	15.9	128.8	0
-79.63	43.68	TORONTO LESTER B. PEARSON INT'L A	6158733	1945-10-01	1945	10	8.4	56.4	0.8
-79.63	43.68	TORONTO LESTER B. PEARSON INT'L A	6158733	1945-11-01	1945	11	3.3	42.2	12.4
-79.63	43.68	TORONTO LESTER B. PEARSON INT'L A	6158733	1945-12-01	1945	12	-6.1	28.7	13
											16.32		849.4	0	111.3	0	960.7	0	770.6	0	#REF!	0	0
-79.63	43.68	TORONTO LESTER B. PEARSON INT'L A	6158733	1946-01-01	1946	1	-5.3	61.5	36.1
-79.63	43.68	TORONTO LESTER B. PEARSON INT'L A	6158733	1946-02-01	1946	2	-6.9	33.5	24.4
-79.63	43.68	TORONTO LESTER B. PEARSON INT'L A	6158733	1946-03-01	1946	3	5.2	28.4	0
-79.63	43.68	TORONTO LESTER B. PEARSON INT'L A	6158733	1946-04-01	1946	4	6	14.5	2.5
-79.63	43.68	TORONTO LESTER B. PEARSON INT'L A	6158733	1946-05-01	1946	5	11.6	95.5	0
-79.63	43.68	TORONTO LESTER B. PEARSON INT'L A	6158733	1946-06-01	1946	6	17.1	43.7	0
-79.63	43.68	TORONTO LESTER B. PEARSON INT'L A	6158733	1946-07-01	1946	7	20.4	79.2	0
-79.63	43.68	TORONTO LESTER B. PEARSON INT'L A	6158733	1946-08-01	1946	8	18.2	37.8	0			218.4
-79.63	43.68	TORONTO LESTER B. PEARSON INT'L A	6158733	1946-09-01	1946	9	16.3	73.7	0			329.9
-79.63	43.68	TORONTO LESTER B. PEARSON INT'L A	6158733	1946-10-01	1946	10	11.7	81	0
-79.63	43.68	TORONTO LESTER B. PEARSON INT'L A	6158733	1946-11-01	1946	11	4.7	36.6	7.9
-79.63	43.68	TORONTO LESTER B. PEARSON INT'L A	6158733	1946-12-01	1946	12	-2.6	32.5	17.8
											16.72		617.9	0	88.7	0	706.5	0	0	0	0	0	0
-79.63	43.68	TORONTO LESTER B. PEARSON INT'L A	6158733	1947-01-01	1947	1	-4.6	45.7	52.6
-79.63	43.68	TORONTO LESTER B. PEARSON INT'L A	6158733	1947-02-01	1947	2	-7.2	0	27.2
-79.63	43.68	TORONTO LESTER B. PEARSON INT'L A	6158733	1947-03-01	1947	3	-2.2	24.4	22.4
-79.63	43.68	TORONTO LESTER B. PEARSON INT'L A	6158733	1947-04-01	1947	4	5.1	56.4	18.5
-79.63	43.68	TORONTO LESTER B. PEARSON INT'L A	6158733	1947-05-01	1947	5	10.7	84.8	0
-79.63	43.68	TORONTO LESTER B. PEARSON INT'L A	6158733	1947-06-01	1947	6	17.4	117.1	0
-79.63	43.68	TORONTO LESTER B. PEARSON INT'L A	6158733	1947-07-01	1947	7	20.3	103.1	0
-79.63	43.68	TORONTO LESTER B. PEARSON INT'L A	6158733	1947-08-01	1947	8	22.5	61	0
-79.63	43.68	TORONTO LESTER B. PEARSON INT'L A	6158733	1947-09-01	1947	9	16.4	37.6	0
-79.63	43.68	TORONTO LESTER B. PEARSON INT'L A	6158733	1947-10-01	1947	10	13.5	34.3	0
-79.63	43.68	TORONTO LESTER B. PEARSON INT'L A	6158733	1947-11-01	1947	11	2.1	17.5	12.2
-79.63	43.68	TORONTO LESTER B. PEARSON INT'L A	6158733	1947-12-01	1947	12	-4.6	19.6	24.6
											17.46		601.5	0	157.5	0	758.9	0	63	0	684.8	0	0
-79.63	43.68	TORONTO LESTER B. PEARSON INT'L A	6158733	1948-01-01	1948	1	-9.7	2.5	37.6
-79.63	43.68	TORONTO LESTER B. PEARSON INT'L A	6158733	1948-02-01	1948	2	-7.8	33.5	33.5
-79.63	43.68	TORONTO LESTER B. PEARSON INT'L A	6158733	1948-03-01	1948	3	-2.1	44.5	13.5
-79.63	43.68	TORONTO LESTER B. PEARSON INT'L A	6158733	1948-04-01	1948	4	7.6	52.6	0
-79.63	43.68	TORONTO LESTER B. PEARSON INT'L A	6158733	1948-05-01	1948	5	11.2	62.7	0
-79.63	43.68	TORONTO LESTER B. PEARSON INT'L A	6158733	1948-06-01	1948	6	17.9	80.5	0
-79.63	43.68	TORONTO LESTER B. PEARSON INT'L A	6158733	1948-07-01	1948	7	21	51.3	0
-79.63	43.68	TORONTO LESTER B. PEARSON INT'L A	6158733	1948-08-01	1948	8	20.9	48.5	0			180.3
-79.63	43.68	TORONTO LESTER B. PEARSON INT'L A	6158733	1948-09-01	1948	9	17.9	154.4	0			397.4
-79.63	43.68	TORONTO LESTER B. PEARSON INT'L A	6158733	1948-10-01	1948	10	8.4	58.4	0
-79.63	43.68	TORONTO LESTER B. PEARSON INT'L A	6158733	1948-11-01	1948	11	6.3	80.3	0.8
-79.63	43.68	TORONTO LESTER B. PEARSON INT'L A	6158733	1948-12-01	1948	12	-1.7	16.5	31.2
											17.78		685.7	0	116.6	0	802.3	0	23	0	577.7	0	0
-79.63	43.68	TORONTO LESTER B. PEARSON INT'L A	6158733	1949-01-01	1949	1	-2.9	39.4	30
-79.63	43.68	TORONTO LESTER B. PEARSON INT'L A	6158733	1949-02-01	1949	2	-3.6	49.8	26.2
-79.63	43.68	TORONTO LESTER B. PEARSON INT'L A	6158733	1949-03-01	1949	3	-1.7	25.4	37.6
-79.63	43.68	TORONTO LESTER B. PEARSON INT'L A	6158733	1949-04-01	1949	4	6.7	30.7	0.5
-79.63	43.68	TORONTO LESTER B. PEARSON INT'L A	6158733	1949-05-01	1949	5	13.9	9.4	0
-79.63	43.68	TORONTO LESTER B. PEARSON INT'L A	6158733	1949-06-01	1949	6	21.7	4.1	0
-79.63	43.68	TORONTO LESTER B. PEARSON INT'L A	6158733	1949-07-01	1949	7	22.6	61.5	0
-79.63	43.68	TORONTO LESTER B. PEARSON INT'L A	6158733	1949-08-01	1949	8	22	133.9	0			199.5
-79.63	43.68	TORONTO LESTER B. PEARSON INT'L A	6158733	1949-09-01	1949	9	14.3	90.2	0			299.1
-79.63	43.68	TORONTO LESTER B. PEARSON INT'L A	6158733	1949-10-01	1949	10	11.8	67.8	0
-79.63	43.68	TORONTO LESTER B. PEARSON INT'L A	6158733	1949-11-01	1949	11	1.5	23.4	24.6
-79.63	43.68	TORONTO LESTER B. PEARSON INT'L A	6158733	1949-12-01	1949	12	-1.5	72.4	12.4
											18.9		608	0	131.3	0	739.1	0	6	0	498.6	0	0
-79.63	43.68	TORONTO LESTER B. PEARSON INT'L A	6158733	1950-01-01	1950	1	-1.8	59.9	36.6
-79.63	43.68	TORONTO LESTER B. PEARSON INT'L A	6158733	1950-02-01	1950	2	-6.6	5.6	66.5
-79.63	43.68	TORONTO LESTER B. PEARSON INT'L A	6158733	1950-03-01	1950	3	-4.2	21.6	41.7
-79.63	43.68	TORONTO LESTER B. PEARSON INT'L A	6158733	1950-04-01	1950	4	3.4	47.2	14.5
-79.63	43.68	TORONTO LESTER B. PEARSON INT'L A	6158733	1950-05-01	1950	5	12.3	20.1	0
-79.63	43.68	TORONTO LESTER B. PEARSON INT'L A	6158733	1950-06-01	1950	6	17.7	64	0
-79.63	43.68	TORONTO LESTER B. PEARSON INT'L A	6158733	1950-07-01	1950	7	19.9	116.3	0
-79.63	43.68	TORONTO LESTER B. PEARSON INT'L A	6158733	1950-08-01	1950	8	19.2	85.1	0			265.4
-79.63	43.68	TORONTO LESTER B. PEARSON INT'L A	6158733	1950-09-01	1950	9	14.2	22.1	0			307.6
-79.63	43.68	TORONTO LESTER B. PEARSON INT'L A	6158733	1950-10-01	1950	10	11.1	78	0
-79.63	43.68	TORONTO LESTER B. PEARSON INT'L A	6158733	1950-11-01	1950	11	2.2	40.4	50
-79.63	43.68	TORONTO LESTER B. PEARSON INT'L A	6158733	1950-12-01	1950	12	-3.5	21.8	5.8
											16.66		582.1	0	215.1	0	797.2	0	19	0	573	0	0
-79.63	43.68	TORONTO LESTER B. PEARSON INT'L A	6158733	1951-01-01	1951	1	-4.3	35.6	24.9
-79.63	43.68	TORONTO LESTER B. PEARSON INT'L A	6158733	1951-02-01	1951	2	-4.4	33.8	10.4
-79.63	43.68	TORONTO LESTER B. PEARSON INT'L A	6158733	1951-03-01	1951	3	0.3	78	19.6
-79.63	43.68	TORONTO LESTER B. PEARSON INT'L A	6158733	1951-04-01	1951	4	6.3	108.2	0.5
-79.63	43.68	TORONTO LESTER B. PEARSON INT'L A	6158733	1951-05-01	1951	5	13.7	36.8	0
-79.63	43.68	TORONTO LESTER B. PEARSON INT'L A	6158733	1951-06-01	1951	6	17.7	88.4	0
-79.63	43.68	TORONTO LESTER B. PEARSON INT'L A	6158733	1951-07-01	1951	7	21	90.4	0
-79.63	43.68	TORONTO LESTER B. PEARSON INT'L A	6158733	1951-08-01	1951	8	19.5	52.3	0			231.1
-79.63	43.68	TORONTO LESTER B. PEARSON INT'L A	6158733	1951-09-01	1951	9	15.5	41.7	0			309.6
-79.63	43.68	TORONTO LESTER B. PEARSON INT'L A	6158733	1951-10-01	1951	10	9.9	60.5	0
-79.63	43.68	TORONTO LESTER B. PEARSON INT'L A	6158733	1951-11-01	1951	11	0.2	45.5	25.1
-79.63	43.68	TORONTO LESTER B. PEARSON INT'L A	6158733	1951-12-01	1951	12	-3.5	13	86.6
											17.48		684.2	0	167.1	0	851.2	0	16	0	0	0	0
-79.63	43.68	TORONTO LESTER B. PEARSON INT'L A	6158733	1952-01-01	1952	1	-4.7	23.6	43.7
-79.63	43.68	TORONTO LESTER B. PEARSON INT'L A	6158733	1952-02-01	1952	2	-3.7	20.1	20.8
-79.63	43.68	TORONTO LESTER B. PEARSON INT'L A	6158733	1952-03-01	1952	3	-1.1	58.9	7.6
-79.63	43.68	TORONTO LESTER B. PEARSON INT'L A	6158733	1952-04-01	1952	4	8.4	57.9	0.5
-79.63	43.68	TORONTO LESTER B. PEARSON INT'L A	6158733	1952-05-01	1952	5	11.5	72.6	0
-79.63	43.68	TORONTO LESTER B. PEARSON INT'L A	6158733	1952-06-01	1952	6	19.1	29	0
-79.63	43.68	TORONTO LESTER B. PEARSON INT'L A	6158733	1952-07-01	1952	7	22.8	68.8	0
-79.63	43.68	TORONTO LESTER B. PEARSON INT'L A	6158733	1952-08-01	1952	8	19.8	61	0			158.8
-79.63	43.68	TORONTO LESTER B. PEARSON INT'L A	6158733	1952-09-01	1952	9	17.1	60.2	0			291.6
-79.63	43.68	TORONTO LESTER B. PEARSON INT'L A	6158733	1952-10-01	1952	10	6.9	16.5	0.8
-79.63	43.68	TORONTO LESTER B. PEARSON INT'L A	6158733	1952-11-01	1952	11	4.6	90.7	0
-79.63	43.68	TORONTO LESTER B. PEARSON INT'L A	6158733	1952-12-01	1952	12	-0.2	28.7	11.4
											18.06		588	0	84.8	0	672.8	0	8	0	0	0	0
-79.63	43.68	TORONTO LESTER B. PEARSON INT'L A	6158733	1953-01-01	1953	1	-2.9	26.4	16.8
-79.63	43.68	TORONTO LESTER B. PEARSON INT'L A	6158733	1953-02-01	1953	2	-2.4	11.4	24.6
-79.63	43.68	TORONTO LESTER B. PEARSON INT'L A	6158733	1953-03-01	1953	3	1.2	66.8	0.3
-79.63	43.68	TORONTO LESTER B. PEARSON INT'L A	6158733	1953-04-01	1953	4	5.7	62	0
-79.63	43.68	TORONTO LESTER B. PEARSON INT'L A	6158733	1953-05-01	1953	5	13	136.1	0
-79.63	43.68	TORONTO LESTER B. PEARSON INT'L A	6158733	1953-06-01	1953	6	18.5	69.6	0
-79.63	43.68	TORONTO LESTER B. PEARSON INT'L A	6158733	1953-07-01	1953	7	21.2	71.9	0
-79.63	43.68	TORONTO LESTER B. PEARSON INT'L A	6158733	1953-08-01	1953	8	20.6	102.9	0			244.4
-79.63	43.68	TORONTO LESTER B. PEARSON INT'L A	6158733	1953-09-01	1953	9	16	72.9	0			453.4
-79.63	43.68	TORONTO LESTER B. PEARSON INT'L A	6158733	1953-10-01	1953	10	10.5	19.3	0
-79.63	43.68	TORONTO LESTER B. PEARSON INT'L A	6158733	1953-11-01	1953	11	5.4	27.4	14.5
-79.63	43.68	TORONTO LESTER B. PEARSON INT'L A	6158733	1953-12-01	1953	12	-0.6	25.9	21.6
											17.86		692.6	0	77.8	0	770.5	0	0	0	0	0	0
-79.63	43.68	TORONTO LESTER B. PEARSON INT'L A	6158733	1954-01-01	1954	1	-8	17	35.3
-79.63	43.68	TORONTO LESTER B. PEARSON INT'L A	6158733	1954-02-01	1954	2	-1.9	27.2	32.8
-79.63	43.68	TORONTO LESTER B. PEARSON INT'L A	6158733	1954-03-01	1954	3	-1.2	56.6	20.3
-79.63	43.68	TORONTO LESTER B. PEARSON INT'L A	6158733	1954-04-01	1954	4	7	91.4	0
-79.63	43.68	TORONTO LESTER B. PEARSON INT'L A	6158733	1954-05-01	1954	5	11.3	19.3	0
-79.63	43.68	TORONTO LESTER B. PEARSON INT'L A	6158733	1954-06-01	1954	6	19.3	116.1	0
-79.63	43.68	TORONTO LESTER B. PEARSON INT'L A	6158733	1954-07-01	1954	7	20.1	18.3	0
-79.63	43.68	TORONTO LESTER B. PEARSON INT'L A	6158733	1954-08-01	1954	8	19.2	91.2	0			225.6
-79.63	43.68	TORONTO LESTER B. PEARSON INT'L A	6158733	1954-09-01	1954	9	15.5	80.5	0			325.4
-79.63	43.68	TORONTO LESTER B. PEARSON INT'L A	6158733	1954-10-01	1954	10	11	213.9	0
-79.63	43.68	TORONTO LESTER B. PEARSON INT'L A	6158733	1954-11-01	1954	11	4	32.8	4.6
-79.63	43.68	TORONTO LESTER B. PEARSON INT'L A	6158733	1954-12-01	1954	12	-3.4	32	25.1
											17.08		796.3	0	118.1	0	914.4	0	23	0	0	0	0
-79.63	43.68	TORONTO LESTER B. PEARSON INT'L A	6158733	1955-01-01	1955	1	-5.8	15	22.1
-79.63	43.68	TORONTO LESTER B. PEARSON INT'L A	6158733	1955-02-01	1955	2	-5.3	24.1	14.5
-79.63	43.68	TORONTO LESTER B. PEARSON INT'L A	6158733	1955-03-01	1955	3	-1.1	27.9	42.7
-79.63	43.68	TORONTO LESTER B. PEARSON INT'L A	6158733	1955-04-01	1955	4	9.5	63.2	0
-79.63	43.68	TORONTO LESTER B. PEARSON INT'L A	6158733	1955-05-01	1955	5	14.6	59.7	0
-79.63	43.68	TORONTO LESTER B. PEARSON INT'L A	6158733	1955-06-01	1955	6	19	24.6	0
-79.63	43.68	TORONTO LESTER B. PEARSON INT'L A	6158733	1955-07-01	1955	7	24.2	34.8	0
-79.63	43.68	TORONTO LESTER B. PEARSON INT'L A	6158733	1955-08-01	1955	8	23	104.4	0			163.8
-79.63	43.68	TORONTO LESTER B. PEARSON INT'L A	6158733	1955-09-01	1955	9	15.8	30.7	0			254.2
-79.63	43.68	TORONTO LESTER B. PEARSON INT'L A	6158733	1955-10-01	1955	10	11	77	0
-79.63	43.68	TORONTO LESTER B. PEARSON INT'L A	6158733	1955-11-01	1955	11	2.4	48.3	3.8
-79.63	43.68	TORONTO LESTER B. PEARSON INT'L A	6158733	1955-12-01	1955	12	-5.5	18.5	34.8
											19.32		528.2	0	117.9	0	646.1	0	3	0	0	0	0
-79.63	43.68	TORONTO LESTER B. PEARSON INT'L A	6158733	1956-01-01	1956	1	-5.7	5.6	37.3
-79.63	43.68	TORONTO LESTER B. PEARSON INT'L A	6158733	1956-02-01	1956	2	-4.5	18.5	27.9
-79.63	43.68	TORONTO LESTER B. PEARSON INT'L A	6158733	1956-03-01	1956	3	-2.5	32.8	43.9
-79.63	43.68	TORONTO LESTER B. PEARSON INT'L A	6158733	1956-04-01	1956	4	4.4	57.9	11.4
-79.63	43.68	TORONTO LESTER B. PEARSON INT'L A	6158733	1956-05-01	1956	5	10.1	114	0
-79.63	43.68	TORONTO LESTER B. PEARSON INT'L A	6158733	1956-06-01	1956	6	18.2	38.9	0
-79.63	43.68	TORONTO LESTER B. PEARSON INT'L A	6158733	1956-07-01	1956	7	19.4	108	0
-79.63	43.68	TORONTO LESTER B. PEARSON INT'L A	6158733	1956-08-01	1956	8	19.5	124.7	0			271.6
-79.63	43.68	TORONTO LESTER B. PEARSON INT'L A	6158733	1956-09-01	1956	9	13.1	40.1	0			425.7
-79.63	43.68	TORONTO LESTER B. PEARSON INT'L A	6158733	1956-10-01	1956	10	10.5	22.9	0
-79.63	43.68	TORONTO LESTER B. PEARSON INT'L A	6158733	1956-11-01	1956	11	3.9	22.4	5.1
-79.63	43.68	TORONTO LESTER B. PEARSON INT'L A	6158733	1956-12-01	1956	12	-1.2	40.6	25.9
											16.06		626.4	0	151.5	0	777.9	0	26	0	0	0	0
-79.63	43.68	TORONTO LESTER B. PEARSON INT'L A	6158733	1957-01-01	1957	1	-8.5	19.3	36.6
-79.63	43.68	TORONTO LESTER B. PEARSON INT'L A	6158733	1957-02-01	1957	2	-4	27.4	30.7
-79.63	43.68	TORONTO LESTER B. PEARSON INT'L A	6158733	1957-03-01	1957	3	0.8	20.1	7.9
-79.63	43.68	TORONTO LESTER B. PEARSON INT'L A	6158733	1957-04-01	1957	4	7.7	76.2	10.7
-79.63	43.68	TORONTO LESTER B. PEARSON INT'L A	6158733	1957-05-01	1957	5	11.8	72.1	0
-79.63	43.68	TORONTO LESTER B. PEARSON INT'L A	6158733	1957-06-01	1957	6	19.2	91.9	0
-79.63	43.68	TORONTO LESTER B. PEARSON INT'L A	6158733	1957-07-01	1957	7	21.1	11.4	0
-79.63	43.68	TORONTO LESTER B. PEARSON INT'L A	6158733	1957-08-01	1957	8	19.2	61	0			164.3
-79.63	43.68	TORONTO LESTER B. PEARSON INT'L A	6158733	1957-09-01	1957	9	15.9	96.8	0			333.2
-79.63	43.68	TORONTO LESTER B. PEARSON INT'L A	6158733	1957-10-01	1957	10	8.9	44.7	0
-79.63	43.68	TORONTO LESTER B. PEARSON INT'L A	6158733	1957-11-01	1957	11	4.1	41.4	4.6
-79.63	43.68	TORONTO LESTER B. PEARSON INT'L A	6158733	1957-12-01	1957	12	-0.2	58.4	10.4
											17.44		620.7	0	100.9	0	721.6	0	13	0	329	0	955
-79.63	43.68	TORONTO LESTER B. PEARSON INT'L A	6158733	1958-01-01	1958	1	-5.1	0	25.1
-79.63	43.68	TORONTO LESTER B. PEARSON INT'L A	6158733	1958-02-01	1958	2	-7.7	11.2	25.7
-79.63	43.68	TORONTO LESTER B. PEARSON INT'L A	6158733	1958-03-01	1958	3	1.4	2.3	22.6
-79.63	43.68	TORONTO LESTER B. PEARSON INT'L A	6158733	1958-04-01	1958	4	8.1	28.7	7.1
-79.63	43.68	TORONTO LESTER B. PEARSON INT'L A	6158733	1958-05-01	1958	5	12	23.9	0
-79.63	43.68	TORONTO LESTER B. PEARSON INT'L A	6158733	1958-06-01	1958	6	16.1	26.7	0
-79.63	43.68	TORONTO LESTER B. PEARSON INT'L A	6158733	1958-07-01	1958	7	21.2	58.4	0
-79.63	43.68	TORONTO LESTER B. PEARSON INT'L A	6158733	1958-08-01	1958	8	20.2	69.1	0			154.2
-79.63	43.68	TORONTO LESTER B. PEARSON INT'L A	6158733	1958-09-01	1958	9	16.6	78.5	0			256.6
-79.63	43.68	TORONTO LESTER B. PEARSON INT'L A	6158733	1958-10-01	1958	10	9.7	31.2	0
-79.63	43.68	TORONTO LESTER B. PEARSON INT'L A	6158733	1958-11-01	1958	11	4.1	50.5	20.6
-79.63	43.68	TORONTO LESTER B. PEARSON INT'L A	6158733	1958-12-01	1958	12	-7	1.3	24.1
											17.22		381.8	0	125.2	0	506.9	0	21	0	337	0	1013
-79.63	43.68	TORONTO LESTER B. PEARSON INT'L A	6158733	1959-01-01	1959	1	-7.2	39.9	25.7
-79.63	43.68	TORONTO LESTER B. PEARSON INT'L A	6158733	1959-02-01	1959	2	-7.6	28.2	46
-79.63	43.68	TORONTO LESTER B. PEARSON INT'L A	6158733	1959-03-01	1959	3	-2	30.7	29.2
-79.63	43.68	TORONTO LESTER B. PEARSON INT'L A	6158733	1959-04-01	1959	4	7.1	61	0
-79.63	43.68	TORONTO LESTER B. PEARSON INT'L A	6158733	1959-05-01	1959	5	14.2	41.1	0.3
-79.63	43.68	TORONTO LESTER B. PEARSON INT'L A	6158733	1959-06-01	1959	6	19.9	22.4	0
-79.63	43.68	TORONTO LESTER B. PEARSON INT'L A	6158733	1959-07-01	1959	7	22.3	27.7	0
-79.63	43.68	TORONTO LESTER B. PEARSON INT'L A	6158733	1959-08-01	1959	8	23.8	38.6	0			88.7
-79.63	43.68	TORONTO LESTER B. PEARSON INT'L A	6158733	1959-09-01	1959	9	18.7	69.3	0			199.1
-79.63	43.68	TORONTO LESTER B. PEARSON INT'L A	6158733	1959-10-01	1959	10	9.7	79.5	0
-79.63	43.68	TORONTO LESTER B. PEARSON INT'L A	6158733	1959-11-01	1959	11	2.1	43.4	12.7
-79.63	43.68	TORONTO LESTER B. PEARSON INT'L A	6158733	1959-12-01	1959	12	-1.4	59.7	20.8
											19.78		541.5	0	134.7	0	676.1	0	30	0	315	0	1005
-79.63	43.68	TORONTO LESTER B. PEARSON INT'L A	6158733	1960-01-01	1960	1	-5.1	33.5	34.5
-79.63	43.68	TORONTO LESTER B. PEARSON INT'L A	6158733	1960-02-01	1960	2	-4.4	26.7	38.1
-79.63	43.68	TORONTO LESTER B. PEARSON INT'L A	6158733	1960-03-01	1960	3	-6	7.1	31.8
-79.63	43.68	TORONTO LESTER B. PEARSON INT'L A	6158733	1960-04-01	1960	4	7.5	61.7	2.8
-79.63	43.68	TORONTO LESTER B. PEARSON INT'L A	6158733	1960-05-01	1960	5	13.6	116.8	0
-79.63	43.68	TORONTO LESTER B. PEARSON INT'L A	6158733	1960-06-01	1960	6	18.2	55.6	0
-79.63	43.68	TORONTO LESTER B. PEARSON INT'L A	6158733	1960-07-01	1960	7	20.3	103.9	0
-79.63	43.68	TORONTO LESTER B. PEARSON INT'L A	6158733	1960-08-01	1960	8	20.4	39.6	0			199.1
-79.63	43.68	TORONTO LESTER B. PEARSON INT'L A	6158733	1960-09-01	1960	9	17.6	6.4	0			322.3
-79.63	43.68	TORONTO LESTER B. PEARSON INT'L A	6158733	1960-10-01	1960	10	9.9	57.7	0.3
-79.63	43.68	TORONTO LESTER B. PEARSON INT'L A	6158733	1960-11-01	1960	11	5.5	52.8	10.7
-79.63	43.68	TORONTO LESTER B. PEARSON INT'L A	6158733	1960-12-01	1960	12	-5.4	1	15.7
											18.02		562.8	0	133.9	0	690.7	0	41	0	319	0	893
-79.63	43.68	TORONTO LESTER B. PEARSON INT'L A	6158733	1961-01-01	1961	1	-8.1	0	15.2
-79.63	43.68	TORONTO LESTER B. PEARSON INT'L A	6158733	1961-02-01	1961	2	-3	41.9	23.4
-79.63	43.68	TORONTO LESTER B. PEARSON INT'L A	6158733	1961-03-01	1961	3	0.1	19.8	32.8
-79.63	43.68	TORONTO LESTER B. PEARSON INT'L A	6158733	1961-04-01	1961	4	4.6	69.6	24.4
-79.63	43.68	TORONTO LESTER B. PEARSON INT'L A	6158733	1961-05-01	1961	5	11.7	63.5	0.5
-79.63	43.68	TORONTO LESTER B. PEARSON INT'L A	6158733	1961-06-01	1961	6	18	82.8	0
-79.63	43.68	TORONTO LESTER B. PEARSON INT'L A	6158733	1961-07-01	1961	7	21.1	80.5	0
-79.63	43.68	TORONTO LESTER B. PEARSON INT'L A	6158733	1961-08-01	1961	8	20.6	56.1	0			219.4
-79.63	43.68	TORONTO LESTER B. PEARSON INT'L A	6158733	1961-09-01	1961	9	19.3	42.4	0			325.3
-79.63	43.68	TORONTO LESTER B. PEARSON INT'L A	6158733	1961-10-01	1961	10	12	14.7	0
-79.63	43.68	TORONTO LESTER B. PEARSON INT'L A	6158733	1961-11-01	1961	11	3.2	48	4.8
-79.63	43.68	TORONTO LESTER B. PEARSON INT'L A	6158733	1961-12-01	1961	12	-2.5	31.2	15.2
											18.14		550.5	0	116.3	0	683.7	0	10	0	267	0	919
-79.63	43.68	TORONTO LESTER B. PEARSON INT'L A	6158733	1962-01-01	1962	1	-7.3	32	37.1
-79.63	43.68	TORONTO LESTER B. PEARSON INT'L A	6158733	1962-02-01	1962	2	-8.1	13	63
-79.63	43.68	TORONTO LESTER B. PEARSON INT'L A	6158733	1962-03-01	1962	3	-0.4	7.9	4.1
-79.63	43.68	TORONTO LESTER B. PEARSON INT'L A	6158733	1962-04-01	1962	4	6.9	24.4	10.2
-79.63	43.68	TORONTO LESTER B. PEARSON INT'L A	6158733	1962-05-01	1962	5	15.9	11.7	0
-79.63	43.68	TORONTO LESTER B. PEARSON INT'L A	6158733	1962-06-01	1962	6	18.7	65.3	0
-79.63	43.68	TORONTO LESTER B. PEARSON INT'L A	6158733	1962-07-01	1962	7	19.8	90.7	0
-79.63	43.68	TORONTO LESTER B. PEARSON INT'L A	6158733	1962-08-01	1962	8	20.5	76.2	0			167.7
-79.63	43.68	TORONTO LESTER B. PEARSON INT'L A	6158733	1962-09-01	1962	9	14.5	131.8	0			268.3
-79.63	43.68	TORONTO LESTER B. PEARSON INT'L A	6158733	1962-10-01	1962	10	10.3	90.9	7.4
-79.63	43.68	TORONTO LESTER B. PEARSON INT'L A	6158733	1962-11-01	1962	11	2.4	93	3.8
-79.63	43.68	TORONTO LESTER B. PEARSON INT'L A	6158733	1962-12-01	1962	12	-4.5	43.7	20.6
											17.88		680.6	0	146.2	0	830.5	0	21	0	329	0	930
-79.63	43.68	TORONTO LESTER B. PEARSON INT'L A	6158733	1963-01-01	1963	1	-8.6	1.3	26.4
-79.63	43.68	TORONTO LESTER B. PEARSON INT'L A	6158733	1963-02-01	1963	2	-9.4	1.8	13
-79.63	43.68	TORONTO LESTER B. PEARSON INT'L A	6158733	1963-03-01	1963	3	0.8	34.5	20.1
-79.63	43.68	TORONTO LESTER B. PEARSON INT'L A	6158733	1963-04-01	1963	4	6.9	44.7	9.4
-79.63	43.68	TORONTO LESTER B. PEARSON INT'L A	6158733	1963-05-01	1963	5	12	72.6	0
-79.63	43.68	TORONTO LESTER B. PEARSON INT'L A	6158733	1963-06-01	1963	6	19.2	42.7	0
-79.63	43.68	TORONTO LESTER B. PEARSON INT'L A	6158733	1963-07-01	1963	7	21.4	73.7	0
-79.63	43.68	TORONTO LESTER B. PEARSON INT'L A	6158733	1963-08-01	1963	8	18.9	57.7	0			189
-79.63	43.68	TORONTO LESTER B. PEARSON INT'L A	6158733	1963-09-01	1963	9	14	48	0			291.4
-79.63	43.68	TORONTO LESTER B. PEARSON INT'L A	6158733	1963-10-01	1963	10	13.6	9.1	0
-79.63	43.68	TORONTO LESTER B. PEARSON INT'L A	6158733	1963-11-01	1963	11	6.2	65	0.5
-79.63	43.68	TORONTO LESTER B. PEARSON INT'L A	6158733	1963-12-01	1963	12	-7.5	5.8	55.9
											17.1		456.9	0	125.3	0	565.4	0	28	0	333	0	985
-79.63	43.68	TORONTO LESTER B. PEARSON INT'L A	6158733	1964-01-01	1964	1	-4	44.2	18.3
-79.63	43.68	TORONTO LESTER B. PEARSON INT'L A	6158733	1964-02-01	1964	2	-6.1	0	32.3
-79.63	43.68	TORONTO LESTER B. PEARSON INT'L A	6158733	1964-03-01	1964	3	-0.8	46	42.9
-79.63	43.68	TORONTO LESTER B. PEARSON INT'L A	6158733	1964-04-01	1964	4	5.8	63	8.1
-79.63	43.68	TORONTO LESTER B. PEARSON INT'L A	6158733	1964-05-01	1964	5	13.8	41.4	0
-79.63	43.68	TORONTO LESTER B. PEARSON INT'L A	6158733	1964-06-01	1964	6	16.7	38.1	0
-79.63	43.68	TORONTO LESTER B. PEARSON INT'L A	6158733	1964-07-01	1964	7	21.1	101.6	0
-79.63	43.68	TORONTO LESTER B. PEARSON INT'L A	6158733	1964-08-01	1964	8	16.8	147.6	0			181.1
-79.63	43.68	TORONTO LESTER B. PEARSON INT'L A	6158733	1964-09-01	1964	9	14.2	14	0			391.7
-79.63	43.68	TORONTO LESTER B. PEARSON INT'L A	6158733	1964-10-01	1964	10	7.6	45.5	0.8
-79.63	43.68	TORONTO LESTER B. PEARSON INT'L A	6158733	1964-11-01	1964	11	3.8	23.4	12.4
-79.63	43.68	TORONTO LESTER B. PEARSON INT'L A	6158733	1964-12-01	1964	12	-3.3	33.8	25.4
											16.52		598.6	0	140.2	0	722.7	0	10	0	285	0	979
-79.63	43.68	TORONTO LESTER B. PEARSON INT'L A	6158733	1965-01-01	1965	1	-6.9	35.6	44.2
-79.63	43.68	TORONTO LESTER B. PEARSON INT'L A	6158733	1965-02-01	1965	2	-5.9	38.4	56.4
-79.63	43.68	TORONTO LESTER B. PEARSON INT'L A	6158733	1965-03-01	1965	3	-3.5	2.5	41.4
-79.63	43.68	TORONTO LESTER B. PEARSON INT'L A	6158733	1965-04-01	1965	4	3.4	65.5	9.7
-79.63	43.68	TORONTO LESTER B. PEARSON INT'L A	6158733	1965-05-01	1965	5	13.3	46.5	0
-79.63	43.68	TORONTO LESTER B. PEARSON INT'L A	6158733	1965-06-01	1965	6	16.5	40.1	0
-79.63	43.68	TORONTO LESTER B. PEARSON INT'L A	6158733	1965-07-01	1965	7	17.3	63.5	0
-79.63	43.68	TORONTO LESTER B. PEARSON INT'L A	6158733	1965-08-01	1965	8	18.1	74.9	0
-79.63	43.68	TORONTO LESTER B. PEARSON INT'L A	6158733	1965-09-01	1965	9	15.2	66.5	0			178.5
-79.63	43.68	TORONTO LESTER B. PEARSON INT'L A	6158733	1965-10-01	1965	10	7.3	103.4	1.3			291.5
-79.63	43.68	TORONTO LESTER B. PEARSON INT'L A	6158733	1965-11-01	1965	11	2.7	76.5	4.8
-79.63	43.68	TORONTO LESTER B. PEARSON INT'L A	6158733	1965-12-01	1965	12	-0.7	48.3	10.4
											16.08		661.7	0	168.2	0	838.4	0	38	0	290	0	890
-79.63	43.68	TORONTO LESTER B. PEARSON INT'L A	6158733	1966-01-01	1966	1	-8.2	2.5	68.8
-79.63	43.68	TORONTO LESTER B. PEARSON INT'L A	6158733	1966-02-01	1966	2	-5.3	17.3	16
-79.63	43.68	TORONTO LESTER B. PEARSON INT'L A	6158733	1966-03-01	1966	3	0.7	44.7	11.7
-79.63	43.68	TORONTO LESTER B. PEARSON INT'L A	6158733	1966-04-01	1966	4	4.6	29.7	18
-79.63	43.68	TORONTO LESTER B. PEARSON INT'L A	6158733	1966-05-01	1966	5	9.4	44.7	0.5
-79.63	43.68	TORONTO LESTER B. PEARSON INT'L A	6158733	1966-06-01	1966	6	17.8	72.6	0
-79.63	43.68	TORONTO LESTER B. PEARSON INT'L A	6158733	1966-07-01	1966	7	21.3	15	0
-79.63	43.68	TORONTO LESTER B. PEARSON INT'L A	6158733	1966-08-01	1966	8	19.4	70.4	0			132.3
-79.63	43.68	TORONTO LESTER B. PEARSON INT'L A	6158733	1966-09-01	1966	9	14	55.1	0			232.4
-79.63	43.68	TORONTO LESTER B. PEARSON INT'L A	6158733	1966-10-01	1966	10	8.3	24.4	0
-79.63	43.68	TORONTO LESTER B. PEARSON INT'L A	6158733	1966-11-01	1966	11	3.9	128	15.7
-79.63	43.68	TORONTO LESTER B. PEARSON INT'L A	6158733	1966-12-01	1966	12	-3.2	71.4	15.2
											16.38		575.8	0	145.9	0	711.8	0	49	0	300	0	836
-79.63	43.68	TORONTO LESTER B. PEARSON INT'L A	6158733	1967-01-01	1967	1	-3.5	12.2	55.1
-79.63	43.68	TORONTO LESTER B. PEARSON INT'L A	6158733	1967-02-01	1967	2	-8.7	13	41.4
-79.63	43.68	TORONTO LESTER B. PEARSON INT'L A	6158733	1967-03-01	1967	3	-2.5	3.3	23.1
-79.63	43.68	TORONTO LESTER B. PEARSON INT'L A	6158733	1967-04-01	1967	4	6.1	85.1	14
-79.63	43.68	TORONTO LESTER B. PEARSON INT'L A	6158733	1967-05-01	1967	5	8.5	48.8	0.3
-79.63	43.68	TORONTO LESTER B. PEARSON INT'L A	6158733	1967-06-01	1967	6	19.3	150.9	0
-79.63	43.68	TORONTO LESTER B. PEARSON INT'L A	6158733	1967-07-01	1967	7	18.9	65	0
-79.63	43.68	TORONTO LESTER B. PEARSON INT'L A	6158733	1967-08-01	1967	8	17.9	45.7	0
-79.63	43.68	TORONTO LESTER B. PEARSON INT'L A	6158733	1967-09-01	1967	9	14.2	68.1	0			261.6
-79.63	43.68	TORONTO LESTER B. PEARSON INT'L A	6158733	1967-10-01	1967	10	8.8	75.2	0			378.5
-79.63	43.68	TORONTO LESTER B. PEARSON INT'L A	6158733	1967-11-01	1967	11	1.3	35.8	3.6
-79.63	43.68	TORONTO LESTER B. PEARSON INT'L A	6158733	1967-12-01	1967	12	-1.9	58.9	10.7
											15.76		662	0	148.2	0	780.9	0	38	0	299	0	819
-79.63	43.68	TORONTO LESTER B. PEARSON INT'L A	6158733	1968-01-01	1968	1	-8.8	41.4	50
-79.63	43.68	TORONTO LESTER B. PEARSON INT'L A	6158733	1968-02-01	1968	2	-7.6	31	7.9
-79.63	43.68	TORONTO LESTER B. PEARSON INT'L A	6158733	1968-03-01	1968	3	0.3	33.3	38.4
-79.63	43.68	TORONTO LESTER B. PEARSON INT'L A	6158733	1968-04-01	1968	4	7.6	30.2	0
-79.63	43.68	TORONTO LESTER B. PEARSON INT'L A	6158733	1968-05-01	1968	5	9.7	101.3	0
-79.63	43.68	TORONTO LESTER B. PEARSON INT'L A	6158733	1968-06-01	1968	6	16.4	57.9	0
-79.63	43.68	TORONTO LESTER B. PEARSON INT'L A	6158733	1968-07-01	1968	7	19.5	58.2	0
-79.63	43.68	TORONTO LESTER B. PEARSON INT'L A	6158733	1968-08-01	1968	8	18.7	163.6	0
-79.63	43.68	TORONTO LESTER B. PEARSON INT'L A	6158733	1968-09-01	1968	9	16.6	88.1	0			279.7
-79.63	43.68	TORONTO LESTER B. PEARSON INT'L A	6158733	1968-10-01	1968	10	10.1	41.1	0			469.1
-79.63	43.68	TORONTO LESTER B. PEARSON INT'L A	6158733	1968-11-01	1968	11	2.6	87.1	6.6
-79.63	43.68	TORONTO LESTER B. PEARSON INT'L A	6158733	1968-12-01	1968	12	-4.8	27.9	39.4
											16.18		761.1	0	142.3	0	890.8	0	28	0	289	0	791
-79.63	43.68	TORONTO LESTER B. PEARSON INT'L A	6158733	1969-01-01	1969	1	-6.5	37.1	17
-79.63	43.68	TORONTO LESTER B. PEARSON INT'L A	6158733	1969-02-01	1969	2	-5.1	0.8	13.5
-79.63	43.68	TORONTO LESTER B. PEARSON INT'L A	6158733	1969-03-01	1969	3	-1.8	26.7	6.6
-79.63	43.68	TORONTO LESTER B. PEARSON INT'L A	6158733	1969-04-01	1969	4	6.8	89.9	0
-79.63	43.68	TORONTO LESTER B. PEARSON INT'L A	6158733	1969-05-01	1969	5	11.2	75.4	0
-79.63	43.68	TORONTO LESTER B. PEARSON INT'L A	6158733	1969-06-01	1969	6	15.9	38.9	0
-79.63	43.68	TORONTO LESTER B. PEARSON INT'L A	6158733	1969-07-01	1969	7	20.1	107.4	0
-79.63	43.68	TORONTO LESTER B. PEARSON INT'L A	6158733	1969-08-01	1969	8	20.9	56.6	0			221.7
-79.63	43.68	TORONTO LESTER B. PEARSON INT'L A	6158733	1969-09-01	1969	9	15.6	15	0			368.2
-79.63	43.68	TORONTO LESTER B. PEARSON INT'L A	6158733	1969-10-01	1969	10	8.3	39.4	12.4
-79.63	43.68	TORONTO LESTER B. PEARSON INT'L A	6158733	1969-11-01	1969	11	3.3	64	7.4
-79.63	43.68	TORONTO LESTER B. PEARSON INT'L A	6158733	1969-12-01	1969	12	-6.3	18.8	50.5
											16.74		570	0	107.4	0	666.1	0	13	0	326	0	812
-79.63	43.68	TORONTO LESTER B. PEARSON INT'L A	6158733	1970-01-01	1970	1	-10.9	1.3	37.6
-79.63	43.68	TORONTO LESTER B. PEARSON INT'L A	6158733	1970-02-01	1970	2	-6.6	5.1	23.9
-79.63	43.68	TORONTO LESTER B. PEARSON INT'L A	6158733	1970-03-01	1970	3	-2.3	25.1	14.5
-79.63	43.68	TORONTO LESTER B. PEARSON INT'L A	6158733	1970-04-01	1970	4	6.6	71.4	7.4
-79.63	43.68	TORONTO LESTER B. PEARSON INT'L A	6158733	1970-05-01	1970	5	12	56.6	0
-79.63	43.68	TORONTO LESTER B. PEARSON INT'L A	6158733	1970-06-01	1970	6	17.1	38.1	0
-79.63	43.68	TORONTO LESTER B. PEARSON INT'L A	6158733	1970-07-01	1970	7	20.6	113.5	0
-79.63	43.68	TORONTO LESTER B. PEARSON INT'L A	6158733	1970-08-01	1970	8	19.7	113.3	0
-79.63	43.68	TORONTO LESTER B. PEARSON INT'L A	6158733	1970-09-01	1970	9	15.4	61.7	0			264.9
-79.63	43.68	TORONTO LESTER B. PEARSON INT'L A	6158733	1970-10-01	1970	10	10.1	63.8	0			383.2
-79.63	43.68	TORONTO LESTER B. PEARSON INT'L A	6158733	1970-11-01	1970	11	4.1	39.4	4.1
-79.63	43.68	TORONTO LESTER B. PEARSON INT'L A	6158733	1970-12-01	1970	12	-5.2	23.1	70.9
											16.96		612.4	0	158.4	0	752.9	0	33	0	297	0	878
-79.63	43.68	TORONTO LESTER B. PEARSON INT'L A	6158733	1971-01-01	1971	1	-9.2	4.8	30.7
-79.63	43.68	TORONTO LESTER B. PEARSON INT'L A	6158733	1971-02-01	1971	2	-5.2	40.9	31.8
-79.63	43.68	TORONTO LESTER B. PEARSON INT'L A	6158733	1971-03-01	1971	3	-3.5	4.8	32.3
-79.63	43.68	TORONTO LESTER B. PEARSON INT'L A	6158733	1971-04-01	1971	4	4.6	24.6	1.5
-79.63	43.68	TORONTO LESTER B. PEARSON INT'L A	6158733	1971-05-01	1971	5	11.6	34.8	0
-79.63	43.68	TORONTO LESTER B. PEARSON INT'L A	6158733	1971-06-01	1971	6	17.9	77	0
-79.63	43.68	TORONTO LESTER B. PEARSON INT'L A	6158733	1971-07-01	1971	7	19	78.5	0
-79.63	43.68	TORONTO LESTER B. PEARSON INT'L A	6158733	1971-08-01	1971	8	18.8	126	0			190.3
-79.63	43.68	TORONTO LESTER B. PEARSON INT'L A	6158733	1971-09-01	1971	9	16.9	32.5	0			340.9
-79.63	43.68	TORONTO LESTER B. PEARSON INT'L A	6158733	1971-10-01	1971	10	12.6	37.6	0
-79.63	43.68	TORONTO LESTER B. PEARSON INT'L A	6158733	1971-11-01	1971	11	2.6	19.3	16.5
-79.63	43.68	TORONTO LESTER B. PEARSON INT'L A	6158733	1971-12-01	1971	12	-1.3	66	31.5
											16.84		546.8	0	144.3	0	672.9	0	43	0	318	0	853
-79.63	43.68	TORONTO LESTER B. PEARSON INT'L A	6158733	1972-01-01	1972	1	-6	10.9	32.8
-79.63	43.68	TORONTO LESTER B. PEARSON INT'L A	6158733	1972-02-01	1972	2	-8	6.1	55.1
-79.63	43.68	TORONTO LESTER B. PEARSON INT'L A	6158733	1972-03-01	1972	3	-4.3	31.2	42.4
-79.63	43.68	TORONTO LESTER B. PEARSON INT'L A	6158733	1972-04-01	1972	4	2.8	42.2	10.2
-79.63	43.68	TORONTO LESTER B. PEARSON INT'L A	6158733	1972-05-01	1972	5	13	35.3	0
-79.63	43.68	TORONTO LESTER B. PEARSON INT'L A	6158733	1972-06-01	1972	6	15.6	113	0
-79.63	43.68	TORONTO LESTER B. PEARSON INT'L A	6158733	1972-07-01	1972	7	19.8	34.5	0
-79.63	43.68	TORONTO LESTER B. PEARSON INT'L A	6158733	1972-08-01	1972	8	18.5	74.9	0			182.8
-79.63	43.68	TORONTO LESTER B. PEARSON INT'L A	6158733	1972-09-01	1972	9	15.4	84.1	0			299.9
-79.63	43.68	TORONTO LESTER B. PEARSON INT'L A	6158733	1972-10-01	1972	10	6.3	98.6	0.3
-79.63	43.68	TORONTO LESTER B. PEARSON INT'L A	6158733	1972-11-01	1972	11	1	53.1	17.8
-79.63	43.68	TORONTO LESTER B. PEARSON INT'L A	6158733	1972-12-01	1972	12	-3.1	54.6	46.2
											16.46		638.5	0	204.8	0	854.8	0	29	0	339	0	897
-79.63	43.68	TORONTO LESTER B. PEARSON INT'L A	6158733	1973-01-01	1973	1	-4.3	19.6	14
-79.63	43.68	TORONTO LESTER B. PEARSON INT'L A	6158733	1973-02-01	1973	2	-7.6	19.3	19.8
-79.63	43.68	TORONTO LESTER B. PEARSON INT'L A	6158733	1973-03-01	1973	3	3.2	112.3	8.9
-79.63	43.68	TORONTO LESTER B. PEARSON INT'L A	6158733	1973-04-01	1973	4	6.5	60.2	2.3
-79.63	43.68	TORONTO LESTER B. PEARSON INT'L A	6158733	1973-05-01	1973	5	10.9	87.9	0
-79.63	43.68	TORONTO LESTER B. PEARSON INT'L A	6158733	1973-06-01	1973	6	18.4	67.8	0
-79.63	43.68	TORONTO LESTER B. PEARSON INT'L A	6158733	1973-07-01	1973	7	20.8	62.5	0
-79.63	43.68	TORONTO LESTER B. PEARSON INT'L A	6158733	1973-08-01	1973	8	21.9	29.2	0			218.2
-79.63	43.68	TORONTO LESTER B. PEARSON INT'L A	6158733	1973-09-01	1973	9	15.7	53.3	0			307.6
-79.63	43.68	TORONTO LESTER B. PEARSON INT'L A	6158733	1973-10-01	1973	10	10.7	124.7	0
-79.63	43.68	TORONTO LESTER B. PEARSON INT'L A	6158733	1973-11-01	1973	11	3.6	91.4	1.8
-79.63	43.68	TORONTO LESTER B. PEARSON INT'L A	6158733	1973-12-01	1973	12	-4.5	37.8	45.5
											17.54		766	0	92.3	0	848.9	0	18	0	289	0	875
-79.63	43.68	TORONTO LESTER B. PEARSON INT'L A	6158733	1974-01-01	1974	1	-5.9	34.3	35.6
-79.63	43.68	TORONTO LESTER B. PEARSON INT'L A	6158733	1974-02-01	1974	2	-8	23.9	25.7
-79.63	43.68	TORONTO LESTER B. PEARSON INT'L A	6158733	1974-03-01	1974	3	-1	41.1	17.3
-79.63	43.68	TORONTO LESTER B. PEARSON INT'L A	6158733	1974-04-01	1974	4	7	90.7	1.5
-79.63	43.68	TORONTO LESTER B. PEARSON INT'L A	6158733	1974-05-01	1974	5	9.9	140	0
-79.63	43.68	TORONTO LESTER B. PEARSON INT'L A	6158733	1974-06-01	1974	6	16.6	127.3	0
-79.63	43.68	TORONTO LESTER B. PEARSON INT'L A	6158733	1974-07-01	1974	7	20.3	58.7	0
-79.63	43.68	TORONTO LESTER B. PEARSON INT'L A	6158733	1974-08-01	1974	8	19.7	14.5	0			326
-79.63	43.68	TORONTO LESTER B. PEARSON INT'L A	6158733	1974-09-01	1974	9	13.9	46.5	0			431.2
-79.63	43.68	TORONTO LESTER B. PEARSON INT'L A	6158733	1974-10-01	1974	10	7.1	24.1	0
-79.63	43.68	TORONTO LESTER B. PEARSON INT'L A	6158733	1974-11-01	1974	11	3.1	72.6	2.3
-79.63	43.68	TORONTO LESTER B. PEARSON INT'L A	6158733	1974-12-01	1974	12	-1.3	16.3	28.4
											16.08		690	0	110.8	0	792.4	0	0	0	325	0	938
-79.63	43.68	TORONTO LESTER B. PEARSON INT'L A	6158733	1975-01-01	1975	1	-3.4	40.9	16
-79.63	43.68	TORONTO LESTER B. PEARSON INT'L A	6158733	1975-02-01	1975	2	-3.9	47	31.8
-79.63	43.68	TORONTO LESTER B. PEARSON INT'L A	6158733	1975-03-01	1975	3	-2.5	44.5	18.8
-79.63	43.68	TORONTO LESTER B. PEARSON INT'L A	6158733	1975-04-01	1975	4	2.8	42.2	27.2
-79.63	43.68	TORONTO LESTER B. PEARSON INT'L A	6158733	1975-05-01	1975	5	15.5	64.3	0
-79.63	43.68	TORONTO LESTER B. PEARSON INT'L A	6158733	1975-06-01	1975	6	18.1	62.5	0
-79.63	43.68	TORONTO LESTER B. PEARSON INT'L A	6158733	1975-07-01	1975	7	21.6	51.3	0
-79.63	43.68	TORONTO LESTER B. PEARSON INT'L A	6158733	1975-08-01	1975	8	19.9	109	0			178.1
-79.63	43.68	TORONTO LESTER B. PEARSON INT'L A	6158733	1975-09-01	1975	9	13.1	65.3	0			329.3
-79.63	43.68	TORONTO LESTER B. PEARSON INT'L A	6158733	1975-10-01	1975	10	9.4	54.9	0
-79.63	43.68	TORONTO LESTER B. PEARSON INT'L A	6158733	1975-11-01	1975	11	6.4	52.8	2.5
-79.63	43.68	TORONTO LESTER B. PEARSON INT'L A	6158733	1975-12-01	1975	12	-4.9	27.4	60.7
											17.64		662.1	0	157	0	789.5	0	15	0	316	0	939
-79.63	43.68	TORONTO LESTER B. PEARSON INT'L A	6158733	1976-01-01	1976	1	-10.1	11.9	47.8
-79.63	43.68	TORONTO LESTER B. PEARSON INT'L A	6158733	1976-02-01	1976	2	-2.8	52.8	6.6
-79.63	43.68	TORONTO LESTER B. PEARSON INT'L A	6158733	1976-03-01	1976	3	0.2	64.8	27.7
-79.63	43.68	TORONTO LESTER B. PEARSON INT'L A	6158733	1976-04-01	1976	4	7.7	47.8	15.2
-79.63	43.68	TORONTO LESTER B. PEARSON INT'L A	6158733	1976-05-01	1976	5	10.6	112.3	2.3
-79.63	43.68	TORONTO LESTER B. PEARSON INT'L A	6158733	1976-06-01	1976	6	18.6	83.3	0
-79.63	43.68	TORONTO LESTER B. PEARSON INT'L A	6158733	1976-07-01	1976	7	18.6	81.8	0
-79.63	43.68	TORONTO LESTER B. PEARSON INT'L A	6158733	1976-08-01	1976	8	18.6	64.8	0			277.4
-79.63	43.68	TORONTO LESTER B. PEARSON INT'L A	6158733	1976-09-01	1976	9	14.4	69.9	0			390
-79.63	43.68	TORONTO LESTER B. PEARSON INT'L A	6158733	1976-10-01	1976	10	6.1	59.4	4.1
-79.63	43.68	TORONTO LESTER B. PEARSON INT'L A	6158733	1976-11-01	1976	11	0.2	7.4	5.3
-79.63	43.68	TORONTO LESTER B. PEARSON INT'L A	6158733	1976-12-01	1976	12	-7.5	12.7	38.4
											16.16		668.9	0	147.4	0	826.6	0	23	0	285	0	888
-79.63	43.68	TORONTO LESTER B. PEARSON INT'L A	6158733	1977-01-01	1977	1	-11.7	0	49.3
-79.63	43.68	TORONTO LESTER B. PEARSON INT'L A	6158733	1977-02-01	1977	2	-6	20.4	7.2
-79.63	43.68	TORONTO LESTER B. PEARSON INT'L A	6158733	1977-03-01	1977	3	2.2	57	17.2
-79.63	43.68	TORONTO LESTER B. PEARSON INT'L A	6158733	1977-04-01	1977	4	7.4	69.6	0.7
-79.63	43.68	TORONTO LESTER B. PEARSON INT'L A	6158733	1977-05-01	1977	5	14.5	28.3	0
-79.63	43.68	TORONTO LESTER B. PEARSON INT'L A	6158733	1977-06-01	1977	6	16.7	104	0
-79.63	43.68	TORONTO LESTER B. PEARSON INT'L A	6158733	1977-07-01	1977	7	20.5	118.5	0
-79.63	43.68	TORONTO LESTER B. PEARSON INT'L A	6158733	1977-08-01	1977	8	18	103.3	0			250.8
-79.63	43.68	TORONTO LESTER B. PEARSON INT'L A	6158733	1977-09-01	1977	9	15.1	154.2	0			423.7
-79.63	43.68	TORONTO LESTER B. PEARSON INT'L A	6158733	1977-10-01	1977	10	8	69.4	0
-79.63	43.68	TORONTO LESTER B. PEARSON INT'L A	6158733	1977-11-01	1977	11	4	77.9	6.6
-79.63	43.68	TORONTO LESTER B. PEARSON INT'L A	6158733	1977-12-01	1977	12	-4.5	50.3	58.7
											16.96		852.9	0	139.7	0	971.3	0	23	0	303	0	908
-79.63	43.68	TORONTO LESTER B. PEARSON INT'L A	6158733	1978-01-01	1978	1	-8.6	30.4	50.8
-79.63	43.68	TORONTO LESTER B. PEARSON INT'L A	6158733	1978-02-01	1978	2	-9.9	0	15.5
-79.63	43.68	TORONTO LESTER B. PEARSON INT'L A	6158733	1978-03-01	1978	3	-3.9	31.5	9.3
-79.63	43.68	TORONTO LESTER B. PEARSON INT'L A	6158733	1978-04-01	1978	4	4	61.7	2.2
-79.63	43.68	TORONTO LESTER B. PEARSON INT'L A	6158733	1978-05-01	1978	5	13.2	68.2	0
-79.63	43.68	TORONTO LESTER B. PEARSON INT'L A	6158733	1978-06-01	1978	6	16.7	25.2	0
-79.63	43.68	TORONTO LESTER B. PEARSON INT'L A	6158733	1978-07-01	1978	7	20.4	42.5	0
-79.63	43.68	TORONTO LESTER B. PEARSON INT'L A	6158733	1978-08-01	1978	8	19.7	63.6	0			135.9
-79.63	43.68	TORONTO LESTER B. PEARSON INT'L A	6158733	1978-09-01	1978	9	14.6	134.3	0			261.2
-79.63	43.68	TORONTO LESTER B. PEARSON INT'L A	6158733	1978-10-01	1978	10	8.2	56.2	0
-79.63	43.68	TORONTO LESTER B. PEARSON INT'L A	6158733	1978-11-01	1978	11	3	44.4	11.6
-79.63	43.68	TORONTO LESTER B. PEARSON INT'L A	6158733	1978-12-01	1978	12	-2.8	40.3	21.6
											16.92		598.3	0	111	0	686	0	40	0	314	0	868
-79.63	43.68	TORONTO LESTER B. PEARSON INT'L A	6158733	1979-01-01	1979	1	-7.7	32.4	41.1
-79.63	43.68	TORONTO LESTER B. PEARSON INT'L A	6158733	1979-02-01	1979	2	-10.8	12	27.6
-79.63	43.68	TORONTO LESTER B. PEARSON INT'L A	6158733	1979-03-01	1979	3	1.6	45.6	3
-79.63	43.68	TORONTO LESTER B. PEARSON INT'L A	6158733	1979-04-01	1979	4	5.3	62.2	25.8
-79.63	43.68	TORONTO LESTER B. PEARSON INT'L A	6158733	1979-05-01	1979	5	11.4	99.2	0
-79.63	43.68	TORONTO LESTER B. PEARSON INT'L A	6158733	1979-06-01	1979	6	17.2	71.8	0
-79.63	43.68	TORONTO LESTER B. PEARSON INT'L A	6158733	1979-07-01	1979	7	20.5	68	0
-79.63	43.68	TORONTO LESTER B. PEARSON INT'L A	6158733	1979-08-01	1979	8	18.6	74.2	0			239
-79.63	43.68	TORONTO LESTER B. PEARSON INT'L A	6158733	1979-09-01	1979	9	14.9	44.5	0			375.4
-79.63	43.68	TORONTO LESTER B. PEARSON INT'L A	6158733	1979-10-01	1979	10	8.5	84.2	0
-79.63	43.68	TORONTO LESTER B. PEARSON INT'L A	6158733	1979-11-01	1979	11	3.7	94.7	1
-79.63	43.68	TORONTO LESTER B. PEARSON INT'L A	6158733	1979-12-01	1979	12	-1.1	84.4	24.3
											16.52		773.2	0	122.8	0	879.2	0	10	0	311	0	889
-79.63	43.68	TORONTO LESTER B. PEARSON INT'L A	6158733	1980-01-01	1980	1	-5.1	30.6	10.9
-79.63	43.68	TORONTO LESTER B. PEARSON INT'L A	6158733	1980-02-01	1980	2	-7.8	6	13.8
-79.63	43.68	TORONTO LESTER B. PEARSON INT'L A	6158733	1980-03-01	1980	3	-2	54.1	29.4
-79.63	43.68	TORONTO LESTER B. PEARSON INT'L A	6158733	1980-04-01	1980	4	6.2	111.6	0.3
-79.63	43.68	TORONTO LESTER B. PEARSON INT'L A	6158733	1980-05-01	1980	5	13.8	48.7	0
-79.63	43.68	TORONTO LESTER B. PEARSON INT'L A	6158733	1980-06-01	1980	6	15.2	89.2	0
-79.63	43.68	TORONTO LESTER B. PEARSON INT'L A	6158733	1980-07-01	1980	7	20.4	182.3	0
-79.63	43.68	TORONTO LESTER B. PEARSON INT'L A	6158733	1980-08-01	1980	8	21.3	37.3	0			320.2
-79.63	43.68	TORONTO LESTER B. PEARSON INT'L A	6158733	1980-09-01	1980	9	15	53.1	0			469.1
-79.63	43.68	TORONTO LESTER B. PEARSON INT'L A	6158733	1980-10-01	1980	10	7	88.7	0
-79.63	43.68	TORONTO LESTER B. PEARSON INT'L A	6158733	1980-11-01	1980	11	2.1	26.5	10.6
-79.63	43.68	TORONTO LESTER B. PEARSON INT'L A	6158733	1980-12-01	1980	12	-6.6	37.6	29.2
											17.14		765.7	0	94.2	0	847.9	0	6	0	330	0	973
-79.63	43.68	TORONTO LESTER B. PEARSON INT'L A	6158733	1981-01-01	1981	1	-10.2	0	14.8
-79.63	43.68	TORONTO LESTER B. PEARSON INT'L A	6158733	1981-02-01	1981	2	-2.1	45.4	19.5
-79.63	43.68	TORONTO LESTER B. PEARSON INT'L A	6158733	1981-03-01	1981	3	0	12.4	7.3
-79.63	43.68	TORONTO LESTER B. PEARSON INT'L A	6158733	1981-04-01	1981	4	7.6	49.3	0.4
-79.63	43.68	TORONTO LESTER B. PEARSON INT'L A	6158733	1981-05-01	1981	5	11.8	58.1	0
-79.63	43.68	TORONTO LESTER B. PEARSON INT'L A	6158733	1981-06-01	1981	6	17.3	61.5	0
-79.63	43.68	TORONTO LESTER B. PEARSON INT'L A	6158733	1981-07-01	1981	7	20.6	66.6	0
-79.63	43.68	TORONTO LESTER B. PEARSON INT'L A	6158733	1981-08-01	1981	8	19.4	128.5	0			186.2
-79.63	43.68	TORONTO LESTER B. PEARSON INT'L A	6158733	1981-09-01	1981	9	14.3	103.3	0			364
-79.63	43.68	TORONTO LESTER B. PEARSON INT'L A	6158733	1981-10-01	1981	10	6.5	126.1	6.1
-79.63	43.68	TORONTO LESTER B. PEARSON INT'L A	6158733	1981-11-01	1981	11	3.4	56.1	1.7
-79.63	43.68	TORONTO LESTER B. PEARSON INT'L A	6158733	1981-12-01	1981	12	-2.9	9	20.8
											16.68		716.3	0	70.6	0	790.3	0	12	0	323	0	758
-79.63	43.68	TORONTO LESTER B. PEARSON INT'L A	6158733	1982-01-01	1982	1	-10.1	20.4	44
-79.63	43.68	TORONTO LESTER B. PEARSON INT'L A	6158733	1982-02-01	1982	2	-7.6	1.8	27.2
-79.63	43.68	TORONTO LESTER B. PEARSON INT'L A	6158733	1982-03-01	1982	3	-2	41.7	24.6
-79.63	43.68	TORONTO LESTER B. PEARSON INT'L A	6158733	1982-04-01	1982	4	4.7	39.4	4.6
-79.63	43.68	TORONTO LESTER B. PEARSON INT'L A	6158733	1982-05-01	1982	5	14.3	45.1	0
-79.63	43.68	TORONTO LESTER B. PEARSON INT'L A	6158733	1982-06-01	1982	6	15.2	112.5	0
-79.63	43.68	TORONTO LESTER B. PEARSON INT'L A	6158733	1982-07-01	1982	7	20.9	31.1	0
-79.63	43.68	TORONTO LESTER B. PEARSON INT'L A	6158733	1982-08-01	1982	8	17.3	120.1	0			188.7
-79.63	43.68	TORONTO LESTER B. PEARSON INT'L A	6158733	1982-09-01	1982	9	14.8	128.9	0			348.2
-79.63	43.68	TORONTO LESTER B. PEARSON INT'L A	6158733	1982-10-01	1982	10	9.7	43.5	0
-79.63	43.68	TORONTO LESTER B. PEARSON INT'L A	6158733	1982-11-01	1982	11	3.9	94	1
-79.63	43.68	TORONTO LESTER B. PEARSON INT'L A	6158733	1982-12-01	1982	12	0.7	56.8	30.4
											16.5		735.3	0	131.8	0	847.4	0	23	0	323	0	896
-79.63	43.68	TORONTO LESTER B. PEARSON INT'L A	6158733	1983-01-01	1983	1	-4.1	21.5	13
-79.63	43.68	TORONTO LESTER B. PEARSON INT'L A	6158733	1983-02-01	1983	2	-3.1	34.7	7.7
-79.63	43.68	TORONTO LESTER B. PEARSON INT'L A	6158733	1983-03-01	1983	3	0.6	59.3	17.4
-79.63	43.68	TORONTO LESTER B. PEARSON INT'L A	6158733	1983-04-01	1983	4	5.5	82	2
-79.63	43.68	TORONTO LESTER B. PEARSON INT'L A	6158733	1983-05-01	1983	5	10.1	99.5	0
-79.63	43.68	TORONTO LESTER B. PEARSON INT'L A	6158733	1983-06-01	1983	6	18.3	33	0
-79.63	43.68	TORONTO LESTER B. PEARSON INT'L A	6158733	1983-07-01	1983	7	22.3	18.3	0
-79.63	43.68	TORONTO LESTER B. PEARSON INT'L A	6158733	1983-08-01	1983	8	21.1	112.2	0			150.8
-79.63	43.68	TORONTO LESTER B. PEARSON INT'L A	6158733	1983-09-01	1983	9	16.7	54.9	0			345
-79.63	43.68	TORONTO LESTER B. PEARSON INT'L A	6158733	1983-10-01	1983	10	8.9	71.8	0
-79.63	43.68	TORONTO LESTER B. PEARSON INT'L A	6158733	1983-11-01	1983	11	3.3	78.9	11.9
-79.63	43.68	TORONTO LESTER B. PEARSON INT'L A	6158733	1983-12-01	1983	12	-6.4	46.2	36.3
											17.7		712.3	0	88.3	0	795.6	0	16	0	274	0	819
-79.63	43.68	TORONTO LESTER B. PEARSON INT'L A	6158733	1984-01-01	1984	1	-9.7	3.6	33.4
-79.63	43.68	TORONTO LESTER B. PEARSON INT'L A	6158733	1984-02-01	1984	2	-1.5	39.2	24.4
-79.63	43.68	TORONTO LESTER B. PEARSON INT'L A	6158733	1984-03-01	1984	3	-4.6	35.4	24.5
-79.63	43.68	TORONTO LESTER B. PEARSON INT'L A	6158733	1984-04-01	1984	4	7.2	56.5	1.6
-79.63	43.68	TORONTO LESTER B. PEARSON INT'L A	6158733	1984-05-01	1984	5	10.3	102.8	0
-79.63	43.68	TORONTO LESTER B. PEARSON INT'L A	6158733	1984-06-01	1984	6	18.2	48.1	0
-79.63	43.68	TORONTO LESTER B. PEARSON INT'L A	6158733	1984-07-01	1984	7	19.8	63.3	0
-79.63	43.68	TORONTO LESTER B. PEARSON INT'L A	6158733	1984-08-01	1984	8	21.1	63.8	0			214.2
-79.63	43.68	TORONTO LESTER B. PEARSON INT'L A	6158733	1984-09-01	1984	9	13.9	74.7	0			334.5
-79.63	43.68	TORONTO LESTER B. PEARSON INT'L A	6158733	1984-10-01	1984	10	10.3	26.1	0
-79.63	43.68	TORONTO LESTER B. PEARSON INT'L A	6158733	1984-11-01	1984	11	2.7	69.3	0.6
-79.63	43.68	TORONTO LESTER B. PEARSON INT'L A	6158733	1984-12-01	1984	12	-0.2	41.2	19.4
											16.66		624	0	103.9	0	717.4	0	35	0	315	0	860
-79.63	43.68	TORONTO LESTER B. PEARSON INT'L A	6158733	1985-01-01	1985	1	-8.4	11.4	56
-79.63	43.68	TORONTO LESTER B. PEARSON INT'L A	6158733	1985-02-01	1985	2	-5.8	36.5	41
-79.63	43.68	TORONTO LESTER B. PEARSON INT'L A	6158733	1985-03-01	1985	3	0.3	45.6	28.6
-79.63	43.68	TORONTO LESTER B. PEARSON INT'L A	6158733	1985-04-01	1985	4	7.3	27.5	5.6
-79.63	43.68	TORONTO LESTER B. PEARSON INT'L A	6158733	1985-05-01	1985	5	13.1	75.9	0
-79.63	43.68	TORONTO LESTER B. PEARSON INT'L A	6158733	1985-06-01	1985	6	15.7	37.3	0
-79.63	43.68	TORONTO LESTER B. PEARSON INT'L A	6158733	1985-07-01	1985	7	19.6	91.5	0
-79.63	43.68	TORONTO LESTER B. PEARSON INT'L A	6158733	1985-08-01	1985	8	19.4	152.5	0			204.7
-79.63	43.68	TORONTO LESTER B. PEARSON INT'L A	6158733	1985-09-01	1985	9	17	57.6	0			384.7
-79.63	43.68	TORONTO LESTER B. PEARSON INT'L A	6158733	1985-10-01	1985	10	9.4	52.3	0
-79.63	43.68	TORONTO LESTER B. PEARSON INT'L A	6158733	1985-11-01	1985	11	3.4	149.6	11
-79.63	43.68	TORONTO LESTER B. PEARSON INT'L A	6158733	1985-12-01	1985	12	-4.6	13.9	25.2
											16.96		751.6	0	167.4	0	936.2	0	21	0	293	0	912
-79.63	43.68	TORONTO LESTER B. PEARSON INT'L A	6158733	1986-01-01	1986	1	-5.6	14.9	18.8
-79.63	43.68	TORONTO LESTER B. PEARSON INT'L A	6158733	1986-02-01	1986	2	-6.1	12.8	20.2
-79.63	43.68	TORONTO LESTER B. PEARSON INT'L A	6158733	1986-03-01	1986	3	0.6	34.6	14.4
-79.63	43.68	TORONTO LESTER B. PEARSON INT'L A	6158733	1986-04-01	1986	4	7.6	51.6	2.2
-79.63	43.68	TORONTO LESTER B. PEARSON INT'L A	6158733	1986-05-01	1986	5	14.3	75.2	0
-79.63	43.68	TORONTO LESTER B. PEARSON INT'L A	6158733	1986-06-01	1986	6	16.4	67.4	0
-79.63	43.68	TORONTO LESTER B. PEARSON INT'L A	6158733	1986-07-01	1986	7	21	122.3	0
-79.63	43.68	TORONTO LESTER B. PEARSON INT'L A	6158733	1986-08-01	1986	8	18.4	146.2	0			264.9
-79.63	43.68	TORONTO LESTER B. PEARSON INT'L A	6158733	1986-09-01	1986	9	14.7	212.3	0			462.7
-79.63	43.68	TORONTO LESTER B. PEARSON INT'L A	6158733	1986-10-01	1986	10	8.7	54.8	0
-79.63	43.68	TORONTO LESTER B. PEARSON INT'L A	6158733	1986-11-01	1986	11	1.6	27.8	14.2
-79.63	43.68	TORONTO LESTER B. PEARSON INT'L A	6158733	1986-12-01	1986	12	-1.2	53.7	13.2
											16.96		873.6	0	83	0	951.2	0	8	0	314	0	842
-79.63	43.68	TORONTO LESTER B. PEARSON INT'L A	6158733	1987-01-01	1987	1	-4.6	0.6	58.4
-79.63	43.68	TORONTO LESTER B. PEARSON INT'L A	6158733	1987-02-01	1987	2	-5.8	3.8	10
-79.63	43.68	TORONTO LESTER B. PEARSON INT'L A	6158733	1987-03-01	1987	3	1.8	31.8	14.4
-79.63	43.68	TORONTO LESTER B. PEARSON INT'L A	6158733	1987-04-01	1987	4	8.8	43.6	5
-79.63	43.68	TORONTO LESTER B. PEARSON INT'L A	6158733	1987-05-01	1987	5	14.7	29.6	0
-79.63	43.68	TORONTO LESTER B. PEARSON INT'L A	6158733	1987-06-01	1987	6	19.6	68.3	0
-79.63	43.68	TORONTO LESTER B. PEARSON INT'L A	6158733	1987-07-01	1987	7	22.5	108.1	0
-79.63	43.68	TORONTO LESTER B. PEARSON INT'L A	6158733	1987-08-01	1987	8	19.6	52.3	0			206
-79.63	43.68	TORONTO LESTER B. PEARSON INT'L A	6158733	1987-09-01	1987	9	15.5	108	0			301.9
-79.63	43.68	TORONTO LESTER B. PEARSON INT'L A	6158733	1987-10-01	1987	10	7	47.1	1
-79.63	43.68	TORONTO LESTER B. PEARSON INT'L A	6158733	1987-11-01	1987	11	3.4	77.8	5.6
-79.63	43.68	TORONTO LESTER B. PEARSON INT'L A	6158733	1987-12-01	1987	12	-0.3	32.6	12.6
											18.38		603.6	0	107	0	710.6	0	16	0	244	0	870
-79.63	43.68	TORONTO LESTER B. PEARSON INT'L A	6158733	1988-01-01	1988	1	-4.5	16.9	4.8
-79.63	43.68	TORONTO LESTER B. PEARSON INT'L A	6158733	1988-02-01	1988	2	-6.8	12	52
-79.63	43.68	TORONTO LESTER B. PEARSON INT'L A	6158733	1988-03-01	1988	3	-0.8	21.2	2.4
-79.63	43.68	TORONTO LESTER B. PEARSON INT'L A	6158733	1988-04-01	1988	4	5.9	55.2	0
-79.63	43.68	TORONTO LESTER B. PEARSON INT'L A	6158733	1988-05-01	1988	5	13.9	39.6	0
-79.63	43.68	TORONTO LESTER B. PEARSON INT'L A	6158733	1988-06-01	1988	6	17.7	25	0
-79.63	43.68	TORONTO LESTER B. PEARSON INT'L A	6158733	1988-07-01	1988	7	22.9	109.7	0
-79.63	43.68	TORONTO LESTER B. PEARSON INT'L A	6158733	1988-08-01	1988	8	21.4	37.2	0			174.3
-79.63	43.68	TORONTO LESTER B. PEARSON INT'L A	6158733	1988-09-01	1988	9	15.5	70.6	0			266.7
-79.63	43.68	TORONTO LESTER B. PEARSON INT'L A	6158733	1988-10-01	1988	10	7.2	67.4	0
-79.63	43.68	TORONTO LESTER B. PEARSON INT'L A	6158733	1988-11-01	1988	11	4.5	58.1	0
-79.63	43.68	TORONTO LESTER B. PEARSON INT'L A	6158733	1988-12-01	1988	12	-2.8	18.6	15.6
											18.28		531.5	0	74.8	0	604	0	4	0	310	0	871
-79.63	43.68	TORONTO LESTER B. PEARSON INT'L A	6158733	1989-01-01	1989	1	-2.2	18.8	11.2
-79.63	43.68	TORONTO LESTER B. PEARSON INT'L A	6158733	1989-02-01	1989	2	-6.5	0.8	22
-79.63	43.68	TORONTO LESTER B. PEARSON INT'L A	6158733	1989-03-01	1989	3	-2.1	14.6	16.8
-79.63	43.68	TORONTO LESTER B. PEARSON INT'L A	6158733	1989-04-01	1989	4	5.1	36.6	6
-79.63	43.68	TORONTO LESTER B. PEARSON INT'L A	6158733	1989-05-01	1989	5	13	78.2	0.6
-79.63	43.68	TORONTO LESTER B. PEARSON INT'L A	6158733	1989-06-01	1989	6	18.4	94.7	0
-79.63	43.68	TORONTO LESTER B. PEARSON INT'L A	6158733	1989-07-01	1989	7	21.5	70.4	0
-79.63	43.68	TORONTO LESTER B. PEARSON INT'L A	6158733	1989-08-01	1989	8	19.7	39.6	0			243.3
-79.63	43.68	TORONTO LESTER B. PEARSON INT'L A	6158733	1989-09-01	1989	9	15.7	44.1	0			319.5
-79.63	43.68	TORONTO LESTER B. PEARSON INT'L A	6158733	1989-10-01	1989	10	9.8	76	0
-79.63	43.68	TORONTO LESTER B. PEARSON INT'L A	6158733	1989-11-01	1989	11	1.9	78.3	5
-79.63	43.68	TORONTO LESTER B. PEARSON INT'L A	6158733	1989-12-01	1989	12	-10.1	3.6	30.6
											17.66		555.7	0	92.2	0	629.6	0	17	0	353	0	887
-79.63	43.68	TORONTO LESTER B. PEARSON INT'L A	6158733	1990-01-01	1990	1	-0.8	23.1	12.8
-79.63	43.68	TORONTO LESTER B. PEARSON INT'L A	6158733	1990-02-01	1990	2	-3.5	47	26
-79.63	43.68	TORONTO LESTER B. PEARSON INT'L A	6158733	1990-03-01	1990	3	0.7	24.7	4.4
-79.63	43.68	TORONTO LESTER B. PEARSON INT'L A	6158733	1990-04-01	1990	4	8.3	50.8	2.6
-79.63	43.68	TORONTO LESTER B. PEARSON INT'L A	6158733	1990-05-01	1990	5	11.6	86.6	0
-79.63	43.68	TORONTO LESTER B. PEARSON INT'L A	6158733	1990-06-01	1990	6	18.7	69.4	0
-79.63	43.68	TORONTO LESTER B. PEARSON INT'L A	6158733	1990-07-01	1990	7	20.9	68.4	0
-79.63	43.68	TORONTO LESTER B. PEARSON INT'L A	6158733	1990-08-01	1990	8	20.3	112.6	0			224.4
-79.63	43.68	TORONTO LESTER B. PEARSON INT'L A	6158733	1990-09-01	1990	9	15.3	42.8	0			387.8
-79.63	43.68	TORONTO LESTER B. PEARSON INT'L A	6158733	1990-10-01	1990	10	9.5	87.8	0
-79.63	43.68	TORONTO LESTER B. PEARSON INT'L A	6158733	1990-11-01	1990	11	4.6	38.6	1.6
-79.63	43.68	TORONTO LESTER B. PEARSON INT'L A	6158733	1990-12-01	1990	12	-1	81.5	28.8
							7.34637
							7.6						379.8
										8.71667	17.36		733.3	0	76.2	0	815.3	0	17	0	304	0	971
-79.63	43.68	TORONTO LESTER B. PEARSON INT'L A	6158733	1991-01-01	1991	1	-5.7	11.3	24.6
-79.63	43.68	TORONTO LESTER B. PEARSON INT'L A	6158733	1991-02-01	1991	2	-2.4	2.9	24			min	381.8	0	70.6	0	506.9	0	0	0	#REF!	0	0
-79.63	43.68	TORONTO LESTER B. PEARSON INT'L A	6158733	1991-03-01	1991	3	1.6	88	9.4			max	873.6	0	215.1	0	971.3	0	770.6	0	#REF!	0	1013
-79.63	43.68	TORONTO LESTER B. PEARSON INT'L A	6158733	1991-04-01	1991	4	8.7	114.7	0.4			average	650.735	0	127.084	0	773.043	0	78.4667	0	#REF!	0	596.451
-79.63	43.68	TORONTO LESTER B. PEARSON INT'L A	6158733	1991-05-01	1991	5	16.3	83.6	0			median	632.45	0	125.25	0	779.4	0	21	0	#REF!	0	856.5
-79.63	43.68	TORONTO LESTER B. PEARSON INT'L A	6158733	1991-06-01	1991	6	20	24.4	0
-79.63	43.68	TORONTO LESTER B. PEARSON INT'L A	6158733	1991-07-01	1991	7	21.7	91	0
-79.63	43.68	TORONTO LESTER B. PEARSON INT'L A	6158733	1991-08-01	1991	8	21.1	91.4	0			199
-79.63	43.68	TORONTO LESTER B. PEARSON INT'L A	6158733	1991-09-01	1991	9	14.9	52.1	0			405.1
-79.63	43.68	TORONTO LESTER B. PEARSON INT'L A	6158733	1991-10-01	1991	10	10.4	46.3	0
-79.63	43.68	TORONTO LESTER B. PEARSON INT'L A	6158733	1991-11-01	1991	11	2.4	42.5	18.2
-79.63	43.68	TORONTO LESTER B. PEARSON INT'L A	6158733	1991-12-01	1991	12	-2.4	13.4	34
-79.63	43.68	TORONTO LESTER B. PEARSON INT'L A	6158733	1992-01-01	1992	1	-4.2	13.6	26.6
-79.63	43.68	TORONTO LESTER B. PEARSON INT'L A	6158733	1992-02-01	1992	2	-3.9	23.6	10
-79.63	43.68	TORONTO LESTER B. PEARSON INT'L A	6158733	1992-03-01	1992	3	-1.1	16.5	6.6
-79.63	43.68	TORONTO LESTER B. PEARSON INT'L A	6158733	1992-04-01	1992	4	5.6	133.4	0.6
-79.63	43.68	TORONTO LESTER B. PEARSON INT'L A	6158733	1992-05-01	1992	5	12.3	69.7	0
-79.63	43.68	TORONTO LESTER B. PEARSON INT'L A	6158733	1992-06-01	1992	6	16.4	37.2	0
-79.63	43.68	TORONTO LESTER B. PEARSON INT'L A	6158733	1992-07-01	1992	7	18	134.5	0
-79.63	43.68	TORONTO LESTER B. PEARSON INT'L A	6158733	1992-08-01	1992	8	17.9	154.4	0			326.1
-79.63	43.68	TORONTO LESTER B. PEARSON INT'L A	6158733	1992-09-01	1992	9	14.7	98.4	0			494.2
-79.63	43.68	TORONTO LESTER B. PEARSON INT'L A	6158733	1992-10-01	1992	10	7.4	65.2	0.4
-79.63	43.68	TORONTO LESTER B. PEARSON INT'L A	6158733	1992-11-01	1992	11	2.8	94.4	13.6
-79.63	43.68	TORONTO LESTER B. PEARSON INT'L A	6158733	1992-12-01	1992	12	-1.6	24.3	35
-79.63	43.68	TORONTO LESTER B. PEARSON INT'L A	6158733	1993-01-01	1993	1	-4	43.1	27.2
-79.63	43.68	TORONTO LESTER B. PEARSON INT'L A	6158733	1993-02-01	1993	2	-8.4	0	31.8
-79.63	43.68	TORONTO LESTER B. PEARSON INT'L A	6158733	1993-03-01	1993	3	-2	6.6	28
-79.63	43.68	TORONTO LESTER B. PEARSON INT'L A	6158733	1993-04-01	1993	4	6.6	83.8	1.6
-79.63	43.68	TORONTO LESTER B. PEARSON INT'L A	6158733	1993-05-01	1993	5	12.1	51.6	0
-79.63	43.68	TORONTO LESTER B. PEARSON INT'L A	6158733	1993-06-01	1993	6	17.1	133.8	0
-79.63	43.68	TORONTO LESTER B. PEARSON INT'L A	6158733	1993-07-01	1993	7	21.7	87.7	0
-79.63	43.68	TORONTO LESTER B. PEARSON INT'L A	6158733	1993-08-01	1993	8	21.1	39.9	0			273.1
-79.63	43.68	TORONTO LESTER B. PEARSON INT'L A	6158733	1993-09-01	1993	9	13.6	59.2	0			396.8
-79.63	43.68	TORONTO LESTER B. PEARSON INT'L A	6158733	1993-10-01	1993	10	7.9	70	0.8
-79.63	43.68	TORONTO LESTER B. PEARSON INT'L A	6158733	1993-11-01	1993	11	3.1	61.4	3.8
-79.63	43.68	TORONTO LESTER B. PEARSON INT'L A	6158733	1993-12-01	1993	12	-2.7	20.4	8.8
-79.63	43.68	TORONTO LESTER B. PEARSON INT'L A	6158733	1994-01-01	1994	1	-12.4	30.6	37.8
-79.63	43.68	TORONTO LESTER B. PEARSON INT'L A	6158733	1994-02-01	1994	2	-8.3	0	24.8
-79.63	43.68	TORONTO LESTER B. PEARSON INT'L A	6158733	1994-03-01	1994	3	-0.8	23.8	29
-79.63	43.68	TORONTO LESTER B. PEARSON INT'L A	6158733	1994-04-01	1994	4	7.3	83.4	13.2
-79.63	43.68	TORONTO LESTER B. PEARSON INT'L A	6158733	1994-05-01	1994	5	11.8	78.8	0
-79.63	43.68	TORONTO LESTER B. PEARSON INT'L A	6158733	1994-06-01	1994	6	19.1	54.4	0
-79.63	43.68	TORONTO LESTER B. PEARSON INT'L A	6158733	1994-07-01	1994	7	21.5	83	0
-79.63	43.68	TORONTO LESTER B. PEARSON INT'L A	6158733	1994-08-01	1994	8	18.7	60.1	0			216.2
-79.63	43.68	TORONTO LESTER B. PEARSON INT'L A	6158733	1994-09-01	1994	9	15.9	51.4	0			359.7
-79.63	43.68	TORONTO LESTER B. PEARSON INT'L A	6158733	1994-10-01	1994	10	10	27.4	0
-79.63	43.68	TORONTO LESTER B. PEARSON INT'L A	6158733	1994-11-01	1994	11	5.4	76.7	9.2
-79.63	43.68	TORONTO LESTER B. PEARSON INT'L A	6158733	1994-12-01	1994	12	-0.1	23.8	27
-79.63	43.68	TORONTO LESTER B. PEARSON INT'L A	6158733	1995-01-01	1995	1	-3.1	110	24.6
-79.63	43.68	TORONTO LESTER B. PEARSON INT'L A	6158733	1995-02-01	1995	2	-7.3	8.8	14.6
-79.63	43.68	TORONTO LESTER B. PEARSON INT'L A	6158733	1995-03-01	1995	3	1.9	43.2	8
-79.63	43.68	TORONTO LESTER B. PEARSON INT'L A	6158733	1995-04-01	1995	4	4.1	71.8	5.4
-79.63	43.68	TORONTO LESTER B. PEARSON INT'L A	6158733	1995-05-01	1995	5	13.3	87	0
-79.63	43.68	TORONTO LESTER B. PEARSON INT'L A	6158733	1995-06-01	1995	6	19.9	52.1	0
-79.63	43.68	TORONTO LESTER B. PEARSON INT'L A	6158733	1995-07-01	1995	7	21.9	55.4	0
-79.63	43.68	TORONTO LESTER B. PEARSON INT'L A	6158733	1995-08-01	1995	8	21.8	135.4	0			194.5
-79.63	43.68	TORONTO LESTER B. PEARSON INT'L A	6158733	1995-09-01	1995	9	14	27.5	0			401.7
-79.63	43.68	TORONTO LESTER B. PEARSON INT'L A	6158733	1995-10-01	1995	10	11	131.8	0
-79.63	43.68	TORONTO LESTER B. PEARSON INT'L A	6158733	1995-11-01	1995	11	1	92.6	27.2
-79.63	43.68	TORONTO LESTER B. PEARSON INT'L A	6158733	1995-12-01	1995	12	-5.1	5	30.6
-79.63	43.68	TORONTO LESTER B. PEARSON INT'L A	6158733	1996-01-01	1996	1	-6.7	51.2	25
-79.63	43.68	TORONTO LESTER B. PEARSON INT'L A	6158733	1996-02-01	1996	2	-5.8	26	10.6
-79.63	43.68	TORONTO LESTER B. PEARSON INT'L A	6158733	1996-03-01	1996	3	-2.8	2.2	34.4
-79.63	43.68	TORONTO LESTER B. PEARSON INT'L A	6158733	1996-04-01	1996	4	4.4	81.6	17.4
-79.63	43.68	TORONTO LESTER B. PEARSON INT'L A	6158733	1996-05-01	1996	5	11.6	90.6	0
-79.63	43.68	TORONTO LESTER B. PEARSON INT'L A	6158733	1996-06-01	1996	6	18.6	118	0
-79.63	43.68	TORONTO LESTER B. PEARSON INT'L A	6158733	1996-07-01	1996	7	19.6	97.4	0
-79.63	43.68	TORONTO LESTER B. PEARSON INT'L A	6158733	1996-08-01	1996	8	20.7	48.2	0			306
-79.63	43.68	TORONTO LESTER B. PEARSON INT'L A	6158733	1996-09-01	1996	9	16.5	166.2	0			435.8
-79.63	43.68	TORONTO LESTER B. PEARSON INT'L A	6158733	1996-10-01	1996	10	9.2	75.8	0
-79.63	43.68	TORONTO LESTER B. PEARSON INT'L A	6158733	1996-11-01	1996	11	0.9	23.4	6.8
-79.63	43.68	TORONTO LESTER B. PEARSON INT'L A	6158733	1996-12-01	1996	12	-0.4	66.2	28.2
-79.63	43.68	TORONTO LESTER B. PEARSON INT'L A	6158733	1997-01-01	1997	1	-6.4	18.2	48.8
-79.63	43.68	TORONTO LESTER B. PEARSON INT'L A	6158733	1997-02-01	1997	2	-3.2	62	16.4
-79.63	43.68	TORONTO LESTER B. PEARSON INT'L A	6158733	1997-03-01	1997	3	-1.4	29.8	41.6
-79.63	43.68	TORONTO LESTER B. PEARSON INT'L A	6158733	1997-04-01	1997	4	5.8	25.2	2.6
-79.63	43.68	TORONTO LESTER B. PEARSON INT'L A	6158733	1997-05-01	1997	5	9.6	65.4	0
-79.63	43.68	TORONTO LESTER B. PEARSON INT'L A	6158733	1997-06-01	1997	6	19.8	50.8	0
-79.63	43.68	TORONTO LESTER B. PEARSON INT'L A	6158733	1997-07-01	1997	7	20.9	30	0
-79.63	43.68	TORONTO LESTER B. PEARSON INT'L A	6158733	1997-08-01	1997	8	19	71.8	0			146.2
-79.63	43.68	TORONTO LESTER B. PEARSON INT'L A	6158733	1997-09-01	1997	9	15.5	48	0			243.2
-79.63	43.68	TORONTO LESTER B. PEARSON INT'L A	6158733	1997-10-01	1997	10	9.5	32.2	2.8
-79.63	43.68	TORONTO LESTER B. PEARSON INT'L A	6158733	1997-11-01	1997	11	2.5	35.2	19.2
-79.63	43.68	TORONTO LESTER B. PEARSON INT'L A	6158733	1997-12-01	1997	12	-0.9	17	12.2
-79.63	43.68	TORONTO LESTER B. PEARSON INT'L A	6158733	1998-01-01	1998	1	-2.2	72.8	24
-79.63	43.68	TORONTO LESTER B. PEARSON INT'L A	6158733	1998-02-01	1998	2	-0.3	43.8	1.4
-79.63	43.68	TORONTO LESTER B. PEARSON INT'L A	6158733	1998-03-01	1998	3	2.1	72.4	28
-79.63	43.68	TORONTO LESTER B. PEARSON INT'L A	6158733	1998-04-01	1998	4	8.6	57.2	0
-79.63	43.68	TORONTO LESTER B. PEARSON INT'L A	6158733	1998-05-01	1998	5	17	71.8	0
-79.63	43.68	TORONTO LESTER B. PEARSON INT'L A	6158733	1998-06-01	1998	6	18.9	80.5	0
-79.63	43.68	TORONTO LESTER B. PEARSON INT'L A	6158733	1998-07-01	1998	7	21.2	45.4	0
-79.63	43.68	TORONTO LESTER B. PEARSON INT'L A	6158733	1998-08-01	1998	8	21.7	26.8	0			197.7
-79.63	43.68	TORONTO LESTER B. PEARSON INT'L A	6158733	1998-09-01	1998	9	18.2	38.4	0			281.7
-79.63	43.68	TORONTO LESTER B. PEARSON INT'L A	6158733	1998-10-01	1998	10	10.8	24	0
-79.63	43.68	TORONTO LESTER B. PEARSON INT'L A	6158733	1998-11-01	1998	11	4.9	33.6	0
-79.63	43.68	TORONTO LESTER B. PEARSON INT'L A	6158733	1998-12-01	1998	12	0.7	55.2	8.1
-79.63	43.68	TORONTO LESTER B. PEARSON INT'L A	6158733	1999-01-01	1999	1	-6.2	33	79.6
-79.63	43.68	TORONTO LESTER B. PEARSON INT'L A	6158733	1999-02-01	1999	2	-1.6	24	3.4
-79.63	43.68	TORONTO LESTER B. PEARSON INT'L A	6158733	1999-03-01	1999	3	0.2	0.6	21.4
-79.63	43.68	TORONTO LESTER B. PEARSON INT'L A	6158733	1999-04-01	1999	4	8.1	43.3	3.6
-79.63	43.68	TORONTO LESTER B. PEARSON INT'L A	6158733	1999-05-01	1999	5	15.5	39	0
-79.63	43.68	TORONTO LESTER B. PEARSON INT'L A	6158733	1999-06-01	1999	6	20.4	66.2	0
-79.63	43.68	TORONTO LESTER B. PEARSON INT'L A	6158733	1999-07-01	1999	7	24.3	44.4	0
-79.63	43.68	TORONTO LESTER B. PEARSON INT'L A	6158733	1999-08-01	1999	8	20.3	59	0			149.6
-79.63	43.68	TORONTO LESTER B. PEARSON INT'L A	6158733	1999-09-01	1999	9	18	80	0			251.9
-79.63	43.68	TORONTO LESTER B. PEARSON INT'L A	6158733	1999-10-01	1999	10	9.4	61.8	0
-79.63	43.68	TORONTO LESTER B. PEARSON INT'L A	6158733	1999-11-01	1999	11	5.8	77	1.2
-79.63	43.68	TORONTO LESTER B. PEARSON INT'L A	6158733	1999-12-01	1999	12	-0.7	17.4	8.6
-79.63	43.68	TORONTO LESTER B. PEARSON INT'L A	6158733	2000-01-01	2000	1	-5.8	16.4	17
-79.63	43.68	TORONTO LESTER B. PEARSON INT'L A	6158733	2000-02-01	2000	2	-3.1	15.4	39.1
-79.63	43.68	TORONTO LESTER B. PEARSON INT'L A	6158733	2000-03-01	2000	3	4.5	10.2	7.8
-79.63	43.68	TORONTO LESTER B. PEARSON INT'L A	6158733	2000-04-01	2000	4	6.7	72.4	7.6
-79.63	43.68	TORONTO LESTER B. PEARSON INT'L A	6158733	2000-05-01	2000	5	14.3	124.4	0
-79.63	43.68	TORONTO LESTER B. PEARSON INT'L A	6158733	2000-06-01	2000	6	18.2	169.2	0
-79.63	43.68	TORONTO LESTER B. PEARSON INT'L A	6158733	2000-07-01	2000	7	20.1	33.8	0
-79.63	43.68	TORONTO LESTER B. PEARSON INT'L A	6158733	2000-08-01	2000	8	20.6	38	0
-79.63	43.68	TORONTO LESTER B. PEARSON INT'L A	6158733	2000-09-01	2000	9	15.9	70	0
-79.63	43.68	TORONTO LESTER B. PEARSON INT'L A	6158733	2000-10-01	2000	10	11.2	17.6	0
-79.63	43.68	TORONTO LESTER B. PEARSON INT'L A	6158733	2000-11-01	2000	11	3.6	55	0.4
-79.63	43.68	TORONTO LESTER B. PEARSON INT'L A	6158733	2000-12-01	2000	12	-7.2	12.8	63.8
-79.63	43.68	TORONTO LESTER B. PEARSON INT'L A	6158733	2022-01-01	2001	1	-4.1	21	10.8
-79.63	43.68	TORONTO LESTER B. PEARSON INT'L A	6158733	2022-02-01	2001	2	-3	55.6	36
-79.63	43.68	TORONTO LESTER B. PEARSON INT'L A	6158733	2022-03-01	2001	3	-0.3	8.8	26.4
-79.63	43.68	TORONTO LESTER B. PEARSON INT'L A	6158733	2022-04-01	2001	4	8.3	35.8	0.6
-79.63	43.68	TORONTO LESTER B. PEARSON INT'L A	6158733	2022-05-01	2001	5	14.8	92.2	0
-79.63	43.68	TORONTO LESTER B. PEARSON INT'L A	6158733	2022-06-01	2001	6	19.7	61.8	0
-79.63	43.68	TORONTO LESTER B. PEARSON INT'L A	6158733	2022-07-01	2001	7	21	34	0
-79.63	43.68	TORONTO LESTER B. PEARSON INT'L A	6158733	2022-08-01	2001	8	23.2	34.6	0
-79.63	43.68	TORONTO LESTER B. PEARSON INT'L A	6158733	2022-09-01	2001	9	16.7	50.4	0
-79.63	43.68	TORONTO LESTER B. PEARSON INT'L A	6158733	2022-10-01	2001	10	10.6	108.8	0
-79.63	43.68	TORONTO LESTER B. PEARSON INT'L A	6158733	2022-11-01	2001	11	7.1	75	0
-79.63	43.68	TORONTO LESTER B. PEARSON INT'L A	6158733	2022-12-01	2001	12	1.7	33	7.8
-79.63	43.68	TORONTO LESTER B. PEARSON INT'L A	6158733	2022-01-02	2002	1	-0.5	14.6	31.4
-79.63	43.68	TORONTO LESTER B. PEARSON INT'L A	6158733	2022-02-02	2002	2	-1.3	29.6	7
-79.63	43.68	TORONTO LESTER B. PEARSON INT'L A	6158733	2022-03-02	2002	3	0.4	44.1	17.6
-79.63	43.68	TORONTO LESTER B. PEARSON INT'L A	6158733	2022-04-02	2002	4	7.3	88.8	12.2
-79.63	43.68	TORONTO LESTER B. PEARSON INT'L A	6158733	2022-05-02	2002	5	10.9	80.7	0
-79.63	43.68	TORONTO LESTER B. PEARSON INT'L A	6158733	2022-06-02	2002	6	19.1	59.6	0
-79.63	43.68	TORONTO LESTER B. PEARSON INT'L A	6158733	2022-07-02	2002	7	24.2	59	0
-79.63	43.68	TORONTO LESTER B. PEARSON INT'L A	6158733	2022-08-02	2002	8	22.6	11.6	0
-79.63	43.68	TORONTO LESTER B. PEARSON INT'L A	6158733	2022-09-02	2002	9	20.2	59.2	0
-79.63	43.68	TORONTO LESTER B. PEARSON INT'L A	6158733	2022-10-02	2002	10	8.9	43	0
-79.63	43.68	TORONTO LESTER B. PEARSON INT'L A	6158733	2022-11-02	2002	11	3.2	42.2	27.2
-79.63	43.68	TORONTO LESTER B. PEARSON INT'L A	6158733	2022-12-02	2002	12	-2	14.2	19.5
-79.63	43.68	TORONTO LESTER B. PEARSON INT'L A	6158733	2022-01-03	2003	1	-8.3	0	41.4
-79.63	43.68	TORONTO LESTER B. PEARSON INT'L A	6158733	2022-02-03	2003	2	-7	22.6	23.6
-79.63	43.68	TORONTO LESTER B. PEARSON INT'L A	6158733	2022-03-03	2003	3	-0.7	27.8	23.8
-79.63	43.68	TORONTO LESTER B. PEARSON INT'L A	6158733	2022-04-03	2003	4	5.7	21.6	15.2
-79.63	43.68	TORONTO LESTER B. PEARSON INT'L A	6158733	2022-05-03	2003	5	12.3	152.8	0
-79.63	43.68	TORONTO LESTER B. PEARSON INT'L A	6158733	2022-06-03	2003	6	18.3	63.8	0
-79.63	43.68	TORONTO LESTER B. PEARSON INT'L A	6158733	2022-07-03	2003	7	21.8	66.2	0
-79.63	43.68	TORONTO LESTER B. PEARSON INT'L A	6158733	2022-08-03	2003	8	22.1	53.4	0
-79.63	43.68	TORONTO LESTER B. PEARSON INT'L A	6158733	2022-09-03	2003	9	17	114.2	0
-79.63	43.68	TORONTO LESTER B. PEARSON INT'L A	6158733	2022-10-03	2003	10	9.1	49.4	0
-79.63	43.68	TORONTO LESTER B. PEARSON INT'L A	6158733	2022-11-03	2003	11	4.7	135.2	6.4
-79.63	43.68	TORONTO LESTER B. PEARSON INT'L A	6158733	2022-12-03	2003	12	-0.1	45	19.2
-79.63	43.68	TORONTO LESTER B. PEARSON INT'L A	6158733	2022-01-04	2004	1	-9.4	4.8	63.2
-79.63	43.68	TORONTO LESTER B. PEARSON INT'L A	6158733	2022-02-04	2004	2	-3.8	5.4	17.2
-79.63	43.68	TORONTO LESTER B. PEARSON INT'L A	6158733	2022-03-04	2004	3	2.3	51.8	14.2
-79.63	43.68	TORONTO LESTER B. PEARSON INT'L A	6158733	2022-04-04	2004	4	7	63.6	0.6
-79.63	43.68	TORONTO LESTER B. PEARSON INT'L A	6158733	2022-05-04	2004	5	13.2	98.8	0
-79.63	43.68	TORONTO LESTER B. PEARSON INT'L A	6158733	2022-06-04	2004	6	17.6	62.8	0
-79.63	43.68	TORONTO LESTER B. PEARSON INT'L A	6158733	2022-07-04	2004	7	20.7	119.8	0
-79.63	43.68	TORONTO LESTER B. PEARSON INT'L A	6158733	2022-08-04	2004	8	19.5	60	0
-79.63	43.68	TORONTO LESTER B. PEARSON INT'L A	6158733	2022-09-04	2004	9	18.4	25.2	0
-79.63	43.68	TORONTO LESTER B. PEARSON INT'L A	6158733	2022-10-04	2004	10	10.7	35.2	0
-79.63	43.68	TORONTO LESTER B. PEARSON INT'L A	6158733	2022-11-04	2004	11	5.4	62	2.8
-79.63	43.68	TORONTO LESTER B. PEARSON INT'L A	6158733	2022-12-04	2004	12	-2.8	53.9	36.9
-79.63	43.68	TORONTO LESTER B. PEARSON INT'L A	6158733	2022-01-05	2005	1	-6.8	37.8	33.2
-79.63	43.68	TORONTO LESTER B. PEARSON INT'L A	6158733	2022-02-05	2005	2	-4	43	33.4
-79.63	43.68	TORONTO LESTER B. PEARSON INT'L A	6158733	2022-03-05	2005	3	-1.6	9.6	25.6
-79.63	43.68	TORONTO LESTER B. PEARSON INT'L A	6158733	2022-04-05	2005	4	7.8	81.2	16.2
-79.63	43.68	TORONTO LESTER B. PEARSON INT'L A	6158733	2022-05-05	2005	5	11.9	14.4	0
-79.63	43.68	TORONTO LESTER B. PEARSON INT'L A	6158733	2022-06-05	2005	6	22.6	31.8	0
-79.63	43.68	TORONTO LESTER B. PEARSON INT'L A	6158733	2022-07-05	2005	7	24.1	20.4	0
-79.63	43.68	TORONTO LESTER B. PEARSON INT'L A	6158733	2022-08-05	2005	8	22.5	135.6	0
-79.63	43.68	TORONTO LESTER B. PEARSON INT'L A	6158733	2022-09-05	2005	9	19	79.6	0
-79.63	43.68	TORONTO LESTER B. PEARSON INT'L A	6158733	2022-10-05	2005	10	11.1	47.4	0
-79.63	43.68	TORONTO LESTER B. PEARSON INT'L A	6158733	2022-11-05	2005	11	5.1	91.4	12.4
-79.63	43.68	TORONTO LESTER B. PEARSON INT'L A	6158733	2022-12-05	2005	12	-3.5	20	41.8
-79.63	43.68	TORONTO LESTER B. PEARSON INT'L A	6158733	2022-01-06	2006	1	0.2	66.6	7.8
-79.63	43.68	TORONTO LESTER B. PEARSON INT'L A	6158733	2022-02-06	2006	2	-3.6	53.8	21.6
-79.63	43.68	TORONTO LESTER B. PEARSON INT'L A	6158733	2022-03-06	2006	3	1.3	47.8	1.4
-79.63	43.68	TORONTO LESTER B. PEARSON INT'L A	6158733	2022-04-06	2006	4	8.2	62.4	0
-79.63	43.68	TORONTO LESTER B. PEARSON INT'L A	6158733	2022-05-06	2006	5	14.4	82	0
-79.63	43.68	TORONTO LESTER B. PEARSON INT'L A	6158733	2022-06-06	2006	6	19.8	45.4	0
-79.63	43.68	TORONTO LESTER B. PEARSON INT'L A	6158733	2022-07-06	2006	7	23.4	105.2	0
-79.63	43.68	TORONTO LESTER B. PEARSON INT'L A	6158733	2022-08-06	2006	8	21.1	40.2	0
-79.63	43.68	TORONTO LESTER B. PEARSON INT'L A	6158733	2022-09-06	2006	9	15.7	77.6	0
-79.63	43.68	TORONTO LESTER B. PEARSON INT'L A	6158733	2022-10-06	2006	10	8.7	120.6	0
-79.63	43.68	TORONTO LESTER B. PEARSON INT'L A	6158733	2022-11-06	2006	11	5.3	71.7	0
-79.63	43.68	TORONTO LESTER B. PEARSON INT'L A	6158733	2022-12-06	2006	12	1.9	60.6	1.6
-79.63	43.68	TORONTO LESTER B. PEARSON INT'L A	6158733	2022-01-07	2007	1	-2.9	23.4	15.8
-79.63	43.68	TORONTO LESTER B. PEARSON INT'L A	6158733	2022-02-07	2007	2	-8.4	0	27.2
-79.63	43.68	TORONTO LESTER B. PEARSON INT'L A	6158733	2022-03-07	2007	3	0.4	18.8	13.3
-79.63	43.68	TORONTO LESTER B. PEARSON INT'L A	6158733	2022-04-07	2007	4	6.1	58.4	2.4
-79.63	43.68	TORONTO LESTER B. PEARSON INT'L A	6158733	2022-05-07	2007	5	14.3	73.6	0
-79.63	43.68	TORONTO LESTER B. PEARSON INT'L A	6158733	2022-06-07	2007	6	20.8	43.2	0
-79.63	43.68	TORONTO LESTER B. PEARSON INT'L A	6158733	2022-07-07	2007	7	21.3	47.4	0
-79.63	43.68	TORONTO LESTER B. PEARSON INT'L A	6158733	2022-08-07	2007	8	22.4	20.8	0
-79.63	43.68	TORONTO LESTER B. PEARSON INT'L A	6158733	2022-09-07	2007	9	18.4	28.6	0
-79.63	43.68	TORONTO LESTER B. PEARSON INT'L A	6158733	2022-10-07	2007	10	14.2	41.2	0
-79.63	43.68	TORONTO LESTER B. PEARSON INT'L A	6158733	2022-11-07	2007	11	2.6	73.6	11
-79.63	43.68	TORONTO LESTER B. PEARSON INT'L A	6158733	2022-12-07	2007	12	-2.3	49.2	44.4
-79.63	43.68	TORONTO LESTER B. PEARSON INT'L A	6158733	2022-01-08	2008	1	-2.1	35.6	22.8
-79.63	43.68	TORONTO LESTER B. PEARSON INT'L A	6158733	2022-02-08	2008	2	-5.3	30.6	76.8
-79.63	43.68	TORONTO LESTER B. PEARSON INT'L A	6158733	2022-03-08	2008	3	-1.7	23.2	38
-79.63	43.68	TORONTO LESTER B. PEARSON INT'L A	6158733	2022-04-08	2008	4	9.5	53.6	1
-79.63	43.68	TORONTO LESTER B. PEARSON INT'L A	6158733	2022-05-08	2008	5	11.8	68.8	0
-79.63	43.68	TORONTO LESTER B. PEARSON INT'L A	6158733	2022-06-08	2008	6	19.6	110.4	0
-79.63	43.68	TORONTO LESTER B. PEARSON INT'L A	6158733	2022-07-08	2008	7	21.5	193.2	0
-79.63	43.68	TORONTO LESTER B. PEARSON INT'L A	6158733	2022-08-08	2008	8	19.7	92.6	0
-79.63	43.68	TORONTO LESTER B. PEARSON INT'L A	6158733	2022-09-08	2008	9	16.9	83.4	0
-79.63	43.68	TORONTO LESTER B. PEARSON INT'L A	6158733	2022-10-08	2008	10	9	39.6	0
-79.63	43.68	TORONTO LESTER B. PEARSON INT'L A	6158733	2022-11-08	2008	11	2.9	69.9	13.1
-79.63	43.68	TORONTO LESTER B. PEARSON INT'L A	6158733	2022-12-08	2008	12	-3.1	40	64.8
-79.63	43.68	TORONTO LESTER B. PEARSON INT'L A	6158733	2022-01-09	2009	1	-8.8	1	46
-79.63	43.68	TORONTO LESTER B. PEARSON INT'L A	6158733	2022-02-09	2009	2	-3.7	48	24.4
-79.63	43.68	TORONTO LESTER B. PEARSON INT'L A	6158733	2022-03-09	2009	3	0.8	68	0.6
-79.63	43.68	TORONTO LESTER B. PEARSON INT'L A	6158733	2022-04-09	2009	4	7.8	129.6	3.8
-79.63	43.68	TORONTO LESTER B. PEARSON INT'L A	6158733	2022-05-09	2009	5	13.1	60.8	0
-79.63	43.68	TORONTO LESTER B. PEARSON INT'L A	6158733	2022-06-09	2009	6	17.5	70.2	0
-79.63	43.68	TORONTO LESTER B. PEARSON INT'L A	6158733	2022-07-09	2009	7	19.2	84.8	0
-79.63	43.68	TORONTO LESTER B. PEARSON INT'L A	6158733	2022-08-09	2009	8	20.6	144	0
-79.63	43.68	TORONTO LESTER B. PEARSON INT'L A	6158733	2022-09-09	2009	9	16.9	40.2	0
-79.63	43.68	TORONTO LESTER B. PEARSON INT'L A	6158733	2022-10-09	2009	10	8.7	71	0
-79.63	43.68	TORONTO LESTER B. PEARSON INT'L A	6158733	2022-11-09	2009	11	6	32.2	0
-79.63	43.68	TORONTO LESTER B. PEARSON INT'L A	6158733	2022-12-09	2009	12	-2.4	61	14.2
-79.63	43.68	TORONTO LESTER B. PEARSON INT'L A	6158733	2022-01-10	2010	1	-5.2	17	10.8
-79.63	43.68	TORONTO LESTER B. PEARSON INT'L A	6158733	2022-02-10	2010	2	-3.4	0	27.4
-79.63	43.68	TORONTO LESTER B. PEARSON INT'L A	6158733	2022-03-10	2010	3	4.4	62.6	0
-79.63	43.68	TORONTO LESTER B. PEARSON INT'L A	6158733	2022-04-10	2010	4	10.5	36.2	0
-79.63	43.68	TORONTO LESTER B. PEARSON INT'L A	6158733	2022-05-10	2010	5	16	51	0
-79.63	43.68	TORONTO LESTER B. PEARSON INT'L A	6158733	2022-06-10	2010	6	19.2	191.6	0
-79.63	43.68	TORONTO LESTER B. PEARSON INT'L A	6158733	2022-07-10	2010	7	23.3	89.6	0
-79.63	43.68	TORONTO LESTER B. PEARSON INT'L A	6158733	2022-08-10	2010	8	22.4	58.6	0
-79.63	43.68	TORONTO LESTER B. PEARSON INT'L A	6158733	2022-09-10	2010	9	16.4	88.2	0
-79.63	43.68	TORONTO LESTER B. PEARSON INT'L A	6158733	2022-10-10	2010	10	10.2	56.8	0.4
-79.63	43.68	TORONTO LESTER B. PEARSON INT'L A	6158733	2022-11-10	2010	11	4.5	66.2	0
-79.63	43.68	TORONTO LESTER B. PEARSON INT'L A	6158733	2022-12-10	2010	12	-3.8	30.2	7
-79.63	43.68	TORONTO LESTER B. PEARSON INT'L A	6158733	2022-01-11	2011	1	-7	11.4	43.8
-79.63	43.68	TORONTO LESTER B. PEARSON INT'L A	6158733	2022-02-11	2011	2	-5.4	13.9	45
-79.63	43.68	TORONTO LESTER B. PEARSON INT'L A	6158733	2022-03-11	2011	3	-0.5	62.8	29.4
-79.63	43.68	TORONTO LESTER B. PEARSON INT'L A	6158733	2022-04-11	2011	4	6.9	93.4	3.2
-79.63	43.68	TORONTO LESTER B. PEARSON INT'L A	6158733	2022-05-11	2011	5	14.1	142	0
-79.63	43.68	TORONTO LESTER B. PEARSON INT'L A	6158733	2022-06-11	2011	6	19.1	59	0
-79.63	43.68	TORONTO LESTER B. PEARSON INT'L A	6158733	2022-07-11	2011	7	24.4	32.4	0
-79.63	43.68	TORONTO LESTER B. PEARSON INT'L A	6158733	2022-08-11	2011	8	21.9	72.2	0
-79.63	43.68	TORONTO LESTER B. PEARSON INT'L A	6158733	2022-09-11	2011	9	17.7	85	0
-79.63	43.68	TORONTO LESTER B. PEARSON INT'L A	6158733	2022-10-11	2011	10	10.5	119.2	0
-79.63	43.68	TORONTO LESTER B. PEARSON INT'L A	6158733	2022-11-11	2011	11	6.6	96.4	1.6
-79.63	43.68	TORONTO LESTER B. PEARSON INT'L A	6158733	2022-12-11	2011	12	0.8	43.6	8.2
-79.63	43.68	TORONTO LESTER B. PEARSON INT'L A	6158733	2022-01-12	2012	1	-1.7	37.6	16.2
-79.63	43.68	TORONTO LESTER B. PEARSON INT'L A	6158733	2022-02-12	2012	2	-0.3	14.2	12.6
-79.63	43.68	TORONTO LESTER B. PEARSON INT'L A	6158733	2022-03-12	2012	3	6.7	15.6	2.4
-79.63	43.68	TORONTO LESTER B. PEARSON INT'L A	6158733	2022-04-12	2012	4	7.3	41.8	1.8
-79.63	43.68	TORONTO LESTER B. PEARSON INT'L A	6158733	2022-05-12	2012	5	16.6	44.4	0
-79.63	43.68	TORONTO LESTER B. PEARSON INT'L A	6158733	2022-06-12	2012	6	20.6	76.4	0
-79.63	43.68	TORONTO LESTER B. PEARSON INT'L A	6158733	2022-07-12	2012	7	24.3	100	0
-79.63	43.68	TORONTO LESTER B. PEARSON INT'L A	6158733	2022-08-12	2012	8	21.6	52.4	0
-79.63	43.68	TORONTO LESTER B. PEARSON INT'L A	6158733	2022-09-12	2012	9	16.4	121	0
-79.63	43.68	TORONTO LESTER B. PEARSON INT'L A	6158733	2022-10-12	2012	10	10.2	126.4	0
-79.63	43.68	TORONTO LESTER B. PEARSON INT'L A	6158733	2022-11-12	2012	11	3.5	10.2	0
-79.63	43.68	TORONTO LESTER B. PEARSON INT'L A	6158733	2022-12-12	2012	12	0.8	43.2	16.2
-79.63	43.68	TORONTO LESTER B. PEARSON INT'L A	6158733	2022-01-13	2013	1	-2.1	54.2	14.4
-79.63	43.68	TORONTO LESTER B. PEARSON INT'L A	6158733	2022-02-13	2013	2	-4.6	23.9	65.3
-79.63	43.68	TORONTO LESTER B. PEARSON INT'L A	6158733	2022-03-13	2013	3	0.1	13.8	8.2
-79.63	43.68	TORONTO LESTER B. PEARSON INT'L A	6158733	2022-04-13	2013	4	6	102.6	2.2
-79.63	43.68	TORONTO LESTER B. PEARSON INT'L A	6158733	2022-05-13	2013	5	15.2	75.6	0.4
-79.63	43.68	TORONTO LESTER B. PEARSON INT'L A	6158733	2022-06-13	2013	6	16.5	62.4	0
							7.69387	57.3639	10.2982
							7.8	52.1	0.15
								53.6543	10.6935
								47.9

## Sheet: Sheet1
Supplement 1. Summary of weather data for the TORONTO LESTER B. PEARSON INT'L A weather station (6158733, Long.: -79.63, Lat.: 43.68) from 1938-1990. Data retrieved from Environment Canada, 01-Nov-2022 (https://climate.weather.gc.ca/)
Year	Average annual Temp (°C)	Summer annual Temp (°C)	Total annual rain (mm)	Total summer annual rain (mm)	Total annual Snow (cm)
1938	8.07	17.62	502.1	317	74.1
1939	7.81	18.625	285.8	169.2	190.5
1940	6.05	16.66	726.1	466.9	164.7
1941	8.04	18.2	524.9	262.1	104.1
1942	7.46	17.14	809.5	479.8	153.4
1943	6.53	17.52	586.6	320.6	125.1
1944	7.53	18.38	644.1	449.4	183.7
1945	6.84	16.32	849.4	522.2	111.3
1946	8.03	16.72	617.9	329.9	88.7
1947	7.45	17.46	601.5	403.6	157.5
1948	7.49	17.78	685.7	397.4	116.6
1949	8.73	18.9	608	299.1	131.3
1950	6.99	16.66	582.1	307.6	215.1
1951	7.66	17.48	684.2	309.6	167.1
1952	8.38	18.06	588	291.6	84.8
1953	8.85	17.86	692.6	453.4	77.8
1954	7.74	17.08	796.3	325.4	118.1
1955	8.48	19.32	528.2	254.2	117.9
1956	7.1	16.06	626.4	425.7	151.5
1957	8	17.44	620.7	333.2	100.9
1958	7.47	17.22	381.8	256.6	125.2
1959	8.3	19.78	541.5	199.1	134.7
1960	7.68	18.02	562.8	322.3	133.9
1961	8.08	18.14	550.5	325.3	116.3
1962	7.39	17.88	680.6	375.7	146.2
1963	7.29	17.1	456.9	294.7	125.3
1964	7.13	16.52	598.6	342.7	140.2
1965	6.4	16.08	661.7	291.5	168.2
1966	6.89	16.38	575.8	257.8	145.9
1967	6.53	15.76	662	378.5	148.2
1968	6.69	16.18	761.1	469.1	142.3
1969	6.87	16.74	570	293.3	107.4
1970	6.72	16.96	612.4	383.2	158.4
1971	7.07	16.84	546.8	348.8	144.3
1972	5.92	16.46	638.5	341.8	204.8
1973	7.94	17.54	766	300.7	92.3
1974	6.78	16.08	690	387	110.8
1975	7.68	17.64	662.1	352.4	157
1976	6.22	16.16	668.9	412.1	147.4
1977	7.02	16.96	852.9	508.3	139.7
1978	6.22	16.92	598.3	333.8	111
1979	6.84	16.52	773.2	357.7	122.8
1980	6.63	17.14	765.7	410.6	94.2
1981	7.14	16.68	716.3	418	70.6
1982	6.82	16.5	735.3	437.7	131.8
1983	7.77	17.7	712.3	317.9	88.3
1984	7.29	16.66	624	352.7	103.9
1985	7.2	16.96	751.6	414.8	167.4
1986	7.53	16.96	873.6	623.4	83
1987	8.52	18.38	603.6	366.3	107
1988	7.84	18.28	531.5	282.1	74.8
1989	7.02	17.66	555.7	327	92.2
1990	8.72	17.36	733.3	380	76.2
