# Supplementary material for: Annual-scale assessment of mid-20th century anthropogenic impacts on the algal ecology of Crawford Lake, Ontario, Canada
Source: PeerJ. 2023 Mar 8;11:e14847. doi: 10.7717/peerj.14847 (PMC10007962; doi:10.7717/peerj.14847)
Supplement: Supplemental Information 5 — Left: SCP counts and concentrations by sample number and varve-inferred date. Right: SCP size fraction percentage with graphical representation. [file peerj-11-14847-s005.xlsx]

## Sheet: Size distributions
	CARBYDAT	SAMPLE	<4mm	4 - 10mm	10 - 25mm	25 - 50mm	50 - 75mm	> 75 mm	TOTAL	Conc.	±90% C.L.		Year	<4 µm	4 - 10 µm	10 - 25 µm	25 - 50 µm	50 - 75 µm
			(<2)*	(2 – 4)*	(4 – 10)*	(10 – 20)*	(20 – 30)*	(> 30)*		(gDM-1)	(gDM-1)
	18083	Blank							0	0	0
	18084	2015-2019			10	1			11	968	1254		2017	0	0	0.909091	0.0909091	0
	18085	2010-2014	2	5	2				9	1857	2463		2012	0.222222	0.555556	0.222222	0	0
	18086	2008-2010	2	7	14	5			28	2703	3203		2009	0.0714286	0.25	0.5	0.178571	0
	18087	2005-2008		1	7	1			9	1761	2337		2006.5	0	0.111111	0.777778	0.111111	0
	18088	2000-2004		1	7	4			12	989	1269		2002	0	0.0833333	0.583333	0.333333	0
	18089	1995-2000		1	10	1			12	1701	2182		1997.5	0	0.0833333	0.833333	0.0833333	0
	18090	1991-1994	5	10	14	3			32	2102	2466		1992.5	0.15625	0.3125	0.4375	0.09375	0
	18091	1989-1991		3	17	7			27	2184	2595		1990	0	0.111111	0.62963	0.259259	0
	18092	1984-1989		1	18	3	1		23	2241	2699		1986.5	0	0.0434783	0.782609	0.130435	0.0434783
	18093	1980-1983		9	31	10			50	6793	7735		1981.5	0	0.18	0.62	0.2	0
	18094	1978-1980	1	1	16	9			27	2265	2693		1979	0.037037	0.037037	0.592593	0.333333	0
	18095	1976-1978	1	2	20	10	1		34	3744	4373		1977	0.0294118	0.0588235	0.588235	0.294118	0.0294118
	18096	1974-1976	2	6	24	12			44	5178	5942		1975	0.0454545	0.136364	0.545455	0.272727	0
	18097	1971-1974		10	46	2			58	5658	6386		1972.5	0	0.172414	0.793103	0.0344828	0
	18098	1968-1971		3	38	10	2		53	4962	5630		1969.5	0	0.0566038	0.716981	0.188679	0.0377358
	18099	1965-1968	2	12	62	12	1		89	8410	9284		1966.5	0.0224719	0.134831	0.696629	0.134831	0.011236
	18100	1963-1965	2	12	63	8	3		88	9322	10296		1964	0.0227273	0.136364	0.715909	0.0909091	0.0340909
	18101	1961-1963	2	1	44	12	2		61	7725	8694		1962	0.0327869	0.0163934	0.721311	0.196721	0.0327869
	18102	1959-1961	2	14	49	13			78	10520	11687		1960	0.025641	0.179487	0.628205	0.166667	0
	18103	1956-1958	1	8	41	18	5		73	7906	8812		1957	0.0136986	0.109589	0.561644	0.246575	0.0684932
	18104	1953-1955		6	41	20	1		68	17201	19245		1954	0	0.0882353	0.602941	0.294118	0.0147059
	18105	1950-1952		4	18	9	1		32	3836	4501		1951	0	0.125	0.5625	0.28125	0.03125
	18106	1947-1949		1	8	1			10	1933	2531		1948	0	0.1	0.8	0.1	0
	18107	1944-1946			8	2			10	1418	1858		1945	0	0	0.8	0.2	0
	18108	1941-1943			5				5	1829	2630		1942	0	0	1	0	0
	18109	1938-1940			5	1			6	304	477		1939	0	0	0.833333	0.166667	0
	18110	1933-1937			2	1			3	783	1167		1935	0	0	0.666667	0.333333	0
	18111	1927-1930			3		1		4	276	468		1928.5	0	0	0.75	0	0.25
	18112	1918-1921				2	1		2	107	213		1919.5	0	0	0	1	0.5
	18113	1909-1912			1				1	216	365		1910.5	0	0	1	0	0
	18114	1905-1908				2			2	405	604		1906.5	0	0	0	1	0
	18115	1902-1904			1	3			4	0	0		1903	0	0	0.25	0.75	0
	18116	1898-1901							0	226	382		1899.5
	18117	1895-1897				2			2	157	312		1896	0	0	0	1	0
	18118	1891-1894				1			1	0	0		1892.5	0	0	0	1	0
	18119	1880-1883							0	0	0		1881.5
	18120	1876-1879							0	190	322		1877.5
	18121	1873-1875			2				2	100	197		1874	0	0	1	0	0
	18122	1870-1872			1				1	245	415		1871	0	0	1	0	0
	18123	1866-1869			1	1			2	0	0		1867.5	0	0	0.5	0.5	0
	18124	1860-1865							0	0	0		1862.5
	18125	1850-1852							0	5221	6312		1851
	18126	SCP Ref		3	18	1			22	968	1254
	18127	Blank							0	0	0
