# Supplementary material for: Annual-scale assessment of mid-20th century anthropogenic impacts on the algal ecology of Crawford Lake, Ontario, Canada
Source: PeerJ. 2023 Mar 8;11:e14847. doi: 10.7717/peerj.14847 (PMC10007962; doi:10.7717/peerj.14847)
Supplement: Supplemental Information 6 — Abbreviations displayed within Fig. 6 with accompanying genus and species name. Notes are in the final column. [file peerj-11-14847-s006.xlsx]

## Sheet: Sheet1
ach.cal	Achnanthidium	caledonicum
ach.min	Achnanthidium	minitissimum
ach.micr	Achnanthidium	microcephela
Ach.spp	Achnanthidium	spp.	>5 species
Ach.sp.ell	Rossithidium	sp.
Adl.fas	Adlafia	bryophila
Amp.ovalis	Amphora	ovalis
Aul.ita	Aulacoseira	italia
Bra.mic	Brachysira	microcephela
Lin.bod	Lindavia	bodanica
Cyc.men	Cyclotella	distinguenda
Lin.mich	Lindavia	michiganiana
Cym.lun	Cymbella	cymbiformis
Cym.vul	Encyonema	vulgare
Cym.73.1	Cymbella	spp.	Girdle view
Cym.gir	Cymbella	turgidula
Cymbo.sp.n	Cymbopleura	spp.
Cymbo.152.281	Cymbopleura	lapponica
D.eleg	Denticula	elegans
D.stell	Discotella	stelligera
Dis.spp.	Discotella	spp.	Likely 3-4 species
Encp.alp	Encyonopsis	sp.
Encp.cist	Encyonopsis	sp.
Encp.kram	Encyonopsis	krammeri
Encp.min	Encyonopsis	minuta
Enc.lun.	Encyonema	lunatum
enc.sbro	Encyonema	subrostratum
Enc.gracile	Encyonema	neogracile
Encp.lap	Cymbopleura	lapponica
Eun.mon	Eunotia	indica
Eun.gir	Eunotia	spp.	Girdle view
Fra.acul	Fragilaria	grunowii
Fra.acusl	Fragilaria	acutiuscula
Fra.cnst	Fragilariforma	constricta
Fra.crot	Fragilaria	crotonensis
Fra.ande	Fragilaria	andreseniana
Fra.grac	Fragilaria	radians
Fra.bin	Fragilaria	bidens
Fra.smll	Fragilaria	mesolepta
Fra.24	Fragilaria	sp.
Fra.spp	Fragilaria	spp.	>5 species
Fra.vau	Fragilaria	vaucheriae
Fra.gir	Fragilaria	spp.	Girdle view
Gom.var	Gomphonema	variostratum
Gom.gir	Gomphonema	spp.	Girdle view
Gom.46.1	Gomphonema	coronatum
Gom.46.4	Gomphonema	intricatum
Mer.cir	Meridion	circulare
Nav.crypt	Navicula	cryptotenella
Nav.rad	Navicula	radiosa
Nav.spp	Navicula	spp.	>8 species
Nitz.diss	Nitzschia	dissipata
Nitz.font	Nitzschia	fonticola
Nitz.52.3	Nitzschia	amphibia
Nitz.52.5	Nitzschia	gracilis
Nitz.681.208.	Nitzschia	linearis
Nitz.kuetz	Nitzschia	kuetzingii
Nitz.sp	Nitzschia	palea
Psamm.37.2	Psammothidium	spp.
Staur.lepto	Staurosirella	leptostauron
Pseudo.brevi	Pseudostaurosira	brevistriata
Sell.pup	Sellaphora	pupula
Sell.pup.small	Sellaphora	pupula	Small frustules
Stau.ell	Staurosira	elliptica
Stau.construens.59	Staurosira	construens
Stau.elliptica	Staurosira	elliptica
Stau.pin	Staurosira	pinnata
